# Supplementary material
Source: PubMed Central journal article supplement (PMC4534209)
Supplement: pnas.1510510112.sapp.pdf [file pnas.1510510112.sapp.pdf]

## Supporting Information Materials and Methods

### Mouse strains

The strains of *Zp3-Cre* and *Stra8-Cre* mice used in this study are FVB/N-TgN(*Zp3-Cre*)3Mrt and Tg(*Stra8-cre*)1Reb/J (Jackson labs) respectively. *Zp3Cre* and *Stra8Cre* are exclusively expressed in growing oocytes and spermatogonia respectively (1, 2), permitting the establishment of parental mouse strains with conditional *Tet1/3* deficiency only in female (*Zp3-Cre*) or male (*Stra8-Cre*) germ cells. *Zp3-Cre* and *Stra8-Cre* are expressed after PGC maturation (1, 2), later than the stage at which *Tet1* is highly expressed and *Tet3* is potentially involved (3, 4), thus bypassing any effects of *Tet1* and *Tet3* deletion on the methylation status and expression of imprinted genes. *Zp3-Cre* male mice and *Stra8-Cre* females did not generate deleted alleles, confirming the specificity of Cre expression. *Tet1<sup>fl/fl</sup>*, *Tet3<sup>fl/fl</sup>*, *Zp3-Cre* (*Zp3 DKO*) females and *Tet1<sup>fl/fl</sup>*, *Tet3<sup>fl/fl</sup>*, *Stra8-Cre* (*Stra8 DKO*) males were fertile; when mated with wild type mice, they gave rise to viable and fertile pups with double heterozygous alleles, confirming faithful germline deletion of the *Tet* floxed alleles. Moreover, *Tet3<sup>fl/fl</sup>*, *Zp-3Cre* females bred to WT males produced normal *Tet3<sup>+/-</sup>* pups in our mouse colony, with no indication of any maternal effects of oocyte-specific *Tet3* deletion as previously reported in *Tet3<sup>fl/-</sup>*, *TNAP-Cre* and *Zp3-Cre* mice by embryo transfer (5). However, since *Zp3Cre* expression is turned on during oocyte development (1), we cannot exclude a maternal effect stemming from a potential decrease in *Tet3* expression in oocytes; *Tet1* and *Tet2* are not detectable in oocytes (5), and so may not have a role.

The experimental breeders used in this study were *Zp3 DKO* females and *Stra8 DKO* males, which generate 100% *Tet1/3* DKO progeny, whereas the control breeders (*Tet1<sup>fl/fl</sup>*, *Tet3<sup>fl/fl</sup>*) were their Cre-negative littermates. We generated all females from matings of *Tet1<sup>fl/fl</sup>*, *Tet3<sup>fl/fl</sup>*, *Zp3-Cre* males to *Tet1<sup>fl/fl</sup>*, *Tet3<sup>fl/fl</sup>* females, and all males from the matings of *Tet1<sup>fl/fl</sup>*, *Tet3<sup>fl/fl</sup>*, *Stra8-Cre* females to *Tet1<sup>fl/fl</sup>*, *Tet3<sup>fl/fl</sup>* males, in each case yielding progeny of which 50% were Cre-negative and bore floxed alleles in their germ cells and 50% were Cre-positive and had deleted the floxed regions of both *Tet* alleles. Cre-negative animals were used as controls. This strategy was chosen because *Tet1<sup>+/-</sup>*, *Tet3<sup>+/-</sup>* matings yielded *Tet1/3* DKO embryos with very low frequency (1/16, an effect exacerbated by the small litter size).

### Generation of *Tet1*- and *Tet3*- deficient mice

The endogenous *Tet1* locus was targeted for conditional excision of exons 8, 9, and 10 (**SI Appendix, Fig. S1A, top**). A targeting vector was designed to contain upstream/downstream homology arms, an FRT-flanked neomycin resistance cassette and *Loxp*-flanked central region (**SI Appendix, Fig. S1A, top**). *LoxP* sites were specifically inserted into introns upstream of exon 8 and downstream of exon 10 by standard gene targeting protocols. The linearized vector was electroporated into ART B6-3 ES cells with pure C57BL/6 NTac genetic background. In twenty-four hours, G418 selection enabled us to isolate resistant colonies of the ES clones, which then were expanded for screening. Using Southern blot analysis we identified the correct ES clones with homologous recombination mediated integration of targeting vector at the endogenous *Tet1* locus as shown in **SI Appendix, Figure S1A, top**. Blastocysts injected with the correct ES clones were implanted into B6-albino females and progeny with germline transmission were selected by coat color and PCR-genotyping from ear clips (**SI Appendix, Fig. S1A, bottom**). Mating between the targeted floxed allele mice and *FLP-E* deleter mice produced progeny deleted for the neomycin resistance cassette. The final step of breeding to *CMV-CRE* deleter mice produced *Tet1* knockout mice with deletion of *Tet1* exons 8–10 in all tissues. *Tet3*-deficient mice were generated similarly (**SI Appendix, Fig. S1B**).

### Embryo collection, immunofluorescence and microscopy

Mice were sacrificed and dissected as directed in the laboratory animal protocol. All subsequent steps were performed at room temperature. After timed matings, dissected oviducts (E2.5) or uteri (E3.5 and E4.5) were flushed with 6 µg/ml BSA containing PBS. Embryos were removed from zona pellucida using acidic Tyrode's solution (Sigma, T1788) under a dissecting microscope (Leica), plated on coverslips coated with 0.2% gelatin, then (a) fixed/permeabilized with 1% paraformaldehyde (PFA) and 0.05% NP-40 in PBS for

10 min or **(b)** fixed with 4% PFA in PBS for 10 min and subsequently permeabilized with 0.2% NP-40 in PBS for 5 min, blocked for 1 hr using a PBS-based blocking buffer containing 5% donkey serum, 0.2% fish skin gelatin and 0.2% Tween-20, then sequentially incubated with primary and secondary antibodies in the same blocking buffer for 2 hr and 0.5 hr respectively. Between antibody incubation steps, the coverslips were washed 3 times with PBS-T (0.2% Tween-20) for 5 min. The coverslips were treated for 5 min with DAPI (5 µg/ul) diluted 1:5000 in PBS-T, washed with PBS-T, and mounted using mounting medium (Vectashield). For 5mC and 5hmC staining, nuclear DNA was denatured with 2N HCl for 30 min and then neutralized with 100 mM Tris-HCl, pH 8 for 10 min. Subsequent staining steps were the same as same as described above, except that the blocking buffer was 1%BSA/0.05% Tween-20 in PBS and the washing buffer was 0.05% Tween-20 in PBS. Images were recorded using either Olympus FV10i confocal or Marianas microscope, and processed using imageJ software.

Late-stage embryos were dissected and frozen using the O.C.T. (optimal cutting temperature) compound in the cryomold. Multiple sections of embryos were plated on the slide in the cryostat. The following antibodies are used at the indicated diluting ratio:  $\alpha$ -NANOG (1:100, BD Pharmingen 560259),  $\alpha$ -CDX2 (1:100, BioGenex MU392A-UC),  $\alpha$ -GATA6 (1:50, R&D Systems AF1700),  $\alpha$ -Tet1 (1:100, GeneTex GTX125888; 1:500 Millipore 09-872),  $\alpha$ -Tet3 (1:100, GeneTex GTX121453),  $\alpha$ -5hmC (1:500, Active motif 39791),  $\alpha$ -5mC (1:100, Epigenetek A-1014),  $\alpha$ -Srebp2 (1:300, GeneTex GTX82865, 1:100 Abcam ab30682), pS139- $\gamma$ H2AX (1:100, Biolegend 613408). Alexafluor 488, 555 and 647 secondary antibodies (1:300, Invitrogen).

### Single-embryo and cell RNA sequencing

CTL and *Tet1/3* DKO 8-cell embryos and blastocysts were collected at E2.5 and E3.5 respectively. 8-cell embryos were dissociated using a 1:1 mixture of 10X TrypLE and Collagenase (Life technology). Single cells or embryos were lysed and converted into double stranded cDNA using SMARTer ultra low RNA kit for Illumina sequencing (Clontech). 1 ng of cDNA for each sample was used for preparing libraries using Nextera XT DNA sample preparation kit (Illumina). The good quality of the prepared libraries was validated using the Bioanalyzer high sensitivity DNA kit (Agilent). Then, the library was sequenced using an Illumina HISEQ 2500 instrument. RNA-seq data were mapped against mm9 using Tophat (v. 2.0.0, *-g 1, --mate-std-dev=70, --no-coverage-search, --library-type=fr-unstranded*) by providing a RefSeq gene annotation obtained from the UCSC data base (11/07/2014). Sequencing read counts per gene were calculated using htseq-count (*-m union -s no -t exon -i gene\_id*).

### Analysis of gene expression variability

To identify genes with high variance across samples independent of their expression strength, we performed variance-stabilizing transformation using the *varianceStabilizingTransformation* function available in DESeq (6). Based on this variance-stabilized data (vsd), principal component analysis (PCA) was computed in R using the svd (singular value decomposition) function applied to the top 400 or 500 variable genes. In order to avoid the influence of the gender of the embryos on the PCA, we excluded the genes (**see Fig. 6C**) of the sex chromosomes prior to the analysis.

For the comparison of single-cell gene expression data with expression profiles from zygotes, 2-cell, and 4-cell stage embryos (7), single-cell RNA-seq data was downloaded from NCBI Gene Expression Omnibus (GEO, <http://www.ncbi.nlm.nih.gov/geo/>, accession number GSE57249) and was further processed as described above. We repeated the principal component analysis based on variance-stabilized data (vsd) of the top 500 variable genes across the zygote, 2-cell, 4-cell stage embryos (7), and our 8-cell control samples. Subsequently, we projected the gene expression data of the *Tet1/3* DKO cell samples onto the principal components.

## Differential expression

Differential gene expression has been assessed using the *nbinomTest* function of the R bioconductor library DESeq (6). Subsequently, p-values have been adjusted for multiple testing by applying the R function 'p.adjust', using the method of Benjamini and Hochberg (method='BH')(8). In order to analyze differential expression of transposable elements, Mus musculus and ancestral (shared) repeat sequences were downloaded from Repbase (<http://www.girinst.org/rebase/update/browse.php>, Repeat Class: All; Included Elements: autonomous, non-autonomous, simple; Taxon: Mus Musculus; Output Format: FATSA) RNA-seq reads were aligned to these references using Bowtie 0.12.9 (9) (-y -m 10 -k10 --best --chunkmbs 1000), and the reads per sequence were counted. Differential expression of transposable elements was calculated analogous to differential gene expression using DESeq.

## Single-embryo reduced-representation bisulfite sequencing (RRBS)

Single embryos and 100 fg lambda spike-in DNA (Fermentas) were lysed in the lysis buffer (20 mM Tris-EDTA (pH 8.0), 20 mM KCl, and 0.3% Triton X-100, 1 mg/mL protease (Qiagen)) for 3 h at 50°C and then heat-inactivated for 30 min at 75°C. Released gDNA was treated using 10 U MspI (NEB) in 15 µL reaction for 3 h at 37°C and prepared for RRBS libraries using the Ovation® Ultralow Methyl-Seq Library (Nugen). The good quality of the prepared libraries was validated using the Bioanalyzer high sensitivity DNA kit (Agilent). Then, the library was sequenced using an Illumina HiSeq 2500 instrument. RRBS reads have been trimmed using trim\_galore version 0.3.3 with parameters for RRBS (--rrbs). The reads were aligned to a combined reference from mouse NCBI37/mm9 and lambda J02459.1 genomes using Bismark v0.10.0 (10), based on bowtie 2.2.1. The *Bismark\_methylation\_extractor* script of the Bismark software was used to analyze methylation at CpGs. For each sample, the number of reads covering methylated and unmethylated CpGs were counted in each chromosome, in promoter regions (TSS +/- 2kb), in CpG islands as defined by G. Miklem and L. Hillier in <http://rafalab.jhsph.edu/CGI/> in TFBS downloaded from chipBase (<http://deepbase.sysu.edu.cn/chipbase/chipSeq.php>, mouse/mm9 at 2014/04/25), and in lambda genome, respectively.

## Bisulfite sequencing and CMS dot blot assay

Single embryos were lysed using the lysis buffer in the EZ DNA Methylation-Direct™ Kit (Zymo research). Then, bisulfite treatment was conducted as directed in the provider's manual. The following primers were used: Nanog TSS (5'GGGATTAATTGTGAATTTATAGGG and 5'AAAAAACCCACACTCATATCA), Nanog enhancer (5'TGGATAAGGAATGTAGTAAGTTTG and 5'CCAAAAAATACTAATAATTCAAACCTC), Srebp2 TSS (5' GAGGTTTTTAGTTTTTTTGGTT and 5' ATCTCTATCCACTCCATCAATA) and Srebp2 enhancer (5'TTTTTGATATTTTATTGTTTGGAGG and 5'CCTCCCCCTAACTCTAAATAAA). Amplicons were subcloned into PCR4-topo plasmids and sequenced.

For the CMS dot blot assay (11, 12), cells were incubated with lysis buffer (10 mM Tris (pH8.0), 100 mM NaCl, 2.5 mM EDTA, 0.5% SDS, 200 µg/mL proteinase K and 10 µg/mL RNase) at 55°C overnight followed by phenol-chloroform extraction. Purified genomic DNA was bisulfite-treated using the Methylcode bisulfite conversion kit (Invitrogen). The bisulfite-converted DNA was further denatured in 0.4 M NaOH, 10 mM EDTA at 95°C for 10 min and neutralized in 2M ammonium acetate (pH 7.0). These DNA samples were serially diluted by two-fold and then spotted on a nitrocellulose membrane using Bio-Dot apparatus (Bio-Rad). DNA spots on the membrane were fixed by vacuum baking at 80°C for 2 hr. To detect CMS on the spots, the membrane was blocked with 5% nonfat milk and subsequently incubated with homemade anti-CMS antiserum (1:2,000). After 3 TBS-T washes for 5 min, the membranes were incubated with HRP-conjugated anti-rabbit IgG secondary antibody. All incubation steps were done for 1 hr at room temperature. CMS was detected on X-ray films after treatment of the membranes with HRP substrates, ECL (Perkin Elmer).

### **Methylation-sensitive restriction digest**

CTL and Tet1/3 DKO E10.5 embryos were lysed in buffer containing 10 mM Tris (pH8.0), 100 mM NaCl, 2.5mM EDTA, 0.5% SDS, 200 µg/mL proteinase K and 10 µg/mL RNase. Genomic DNA was prepared, digested with *BstU1* and PCR amplification was conducted as described (13). Briefly, 1 µg DNA was digested in NEBuffer4 using 0.5 U *BstU1* (NEB) at 60 °C for 2 h, which was inactivated with 1 µL Proteinase K (10 mg/mL) at 50 °C for 2 h. The reaction was stopped by incubation at 95 °C for 10 min.

### **Quantitative real time PCR**

Total RNA was extracted using TRIzol reagent (Invitrogen) according to the manufacturer's instructions. 0.5~1 µg RNA was used for cDNA synthesis catalyzed by SuperScript III (Invitrogen). 1/40 of cDNA was added to Universal SYBR Green Master mix (Roche) and analyzed by StepONE plus real-time PCR system (Applied Biosystems). All the intron-spanning qPCR primers in this study were designed and generated via *Integrated DNA technologies, Inc* (<http://www.idtdna.com/site>).

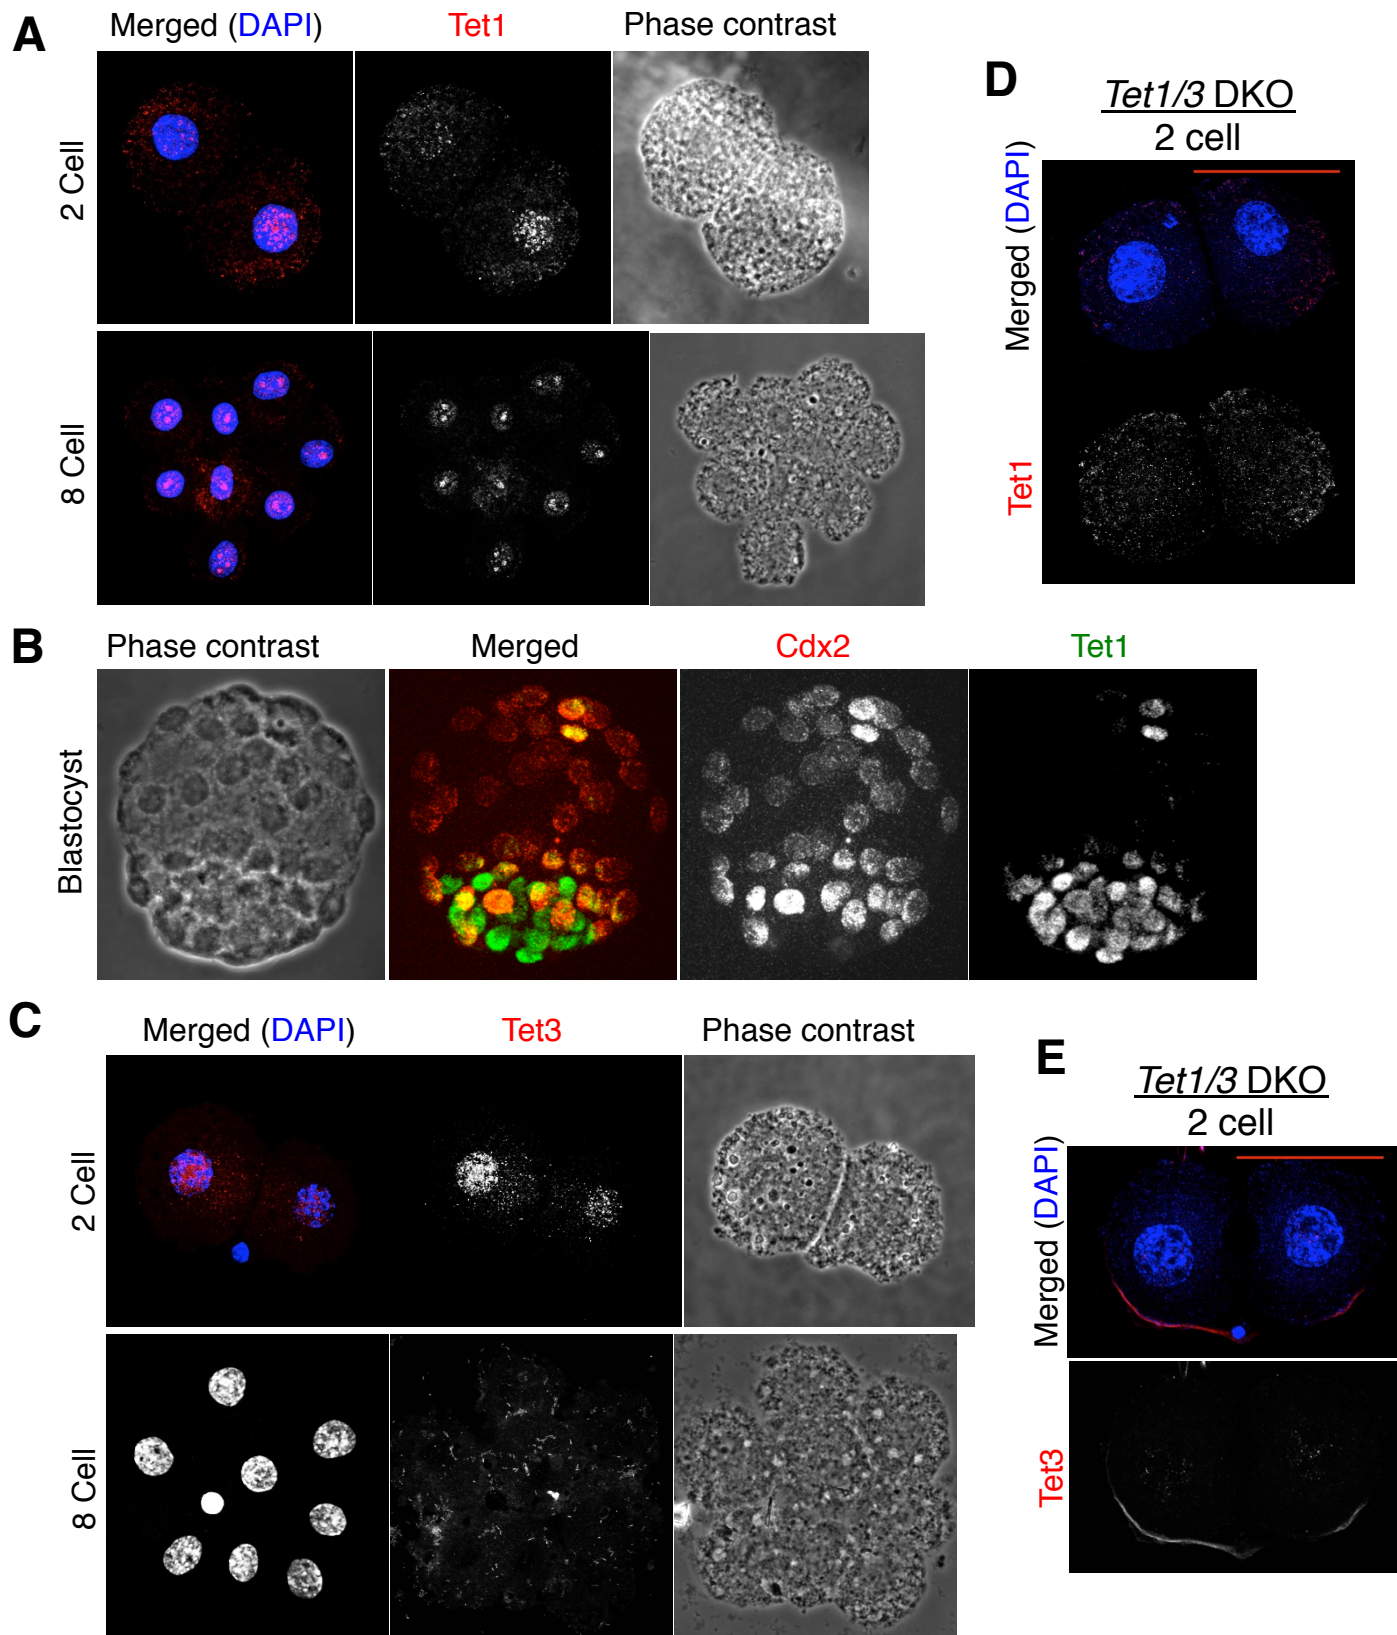

**Figure S1.** Tet1 and Tet3 expression in preimplantation embryos evaluated by immunocytochemistry using specific antibodies. **(A)** Tet1 is expressed in both 2-cell and 8-cell embryos. **(B)** Tet1 is expressed in the blastocyst. **(C)** Tet3 is expressed in the 2-cell but not the 8-cell embryo. Note potential asymmetric distribution of Tet1 and Tet3 at the 2-cell stage. **(D, E)** The specificity of the Tet1 **(D)** and Tet3 **(E)** antibodies was confirmed by showing lack of staining of a *Tet1/3* DKO 2-cell embryo. Scale bar 50  $\mu$ m.

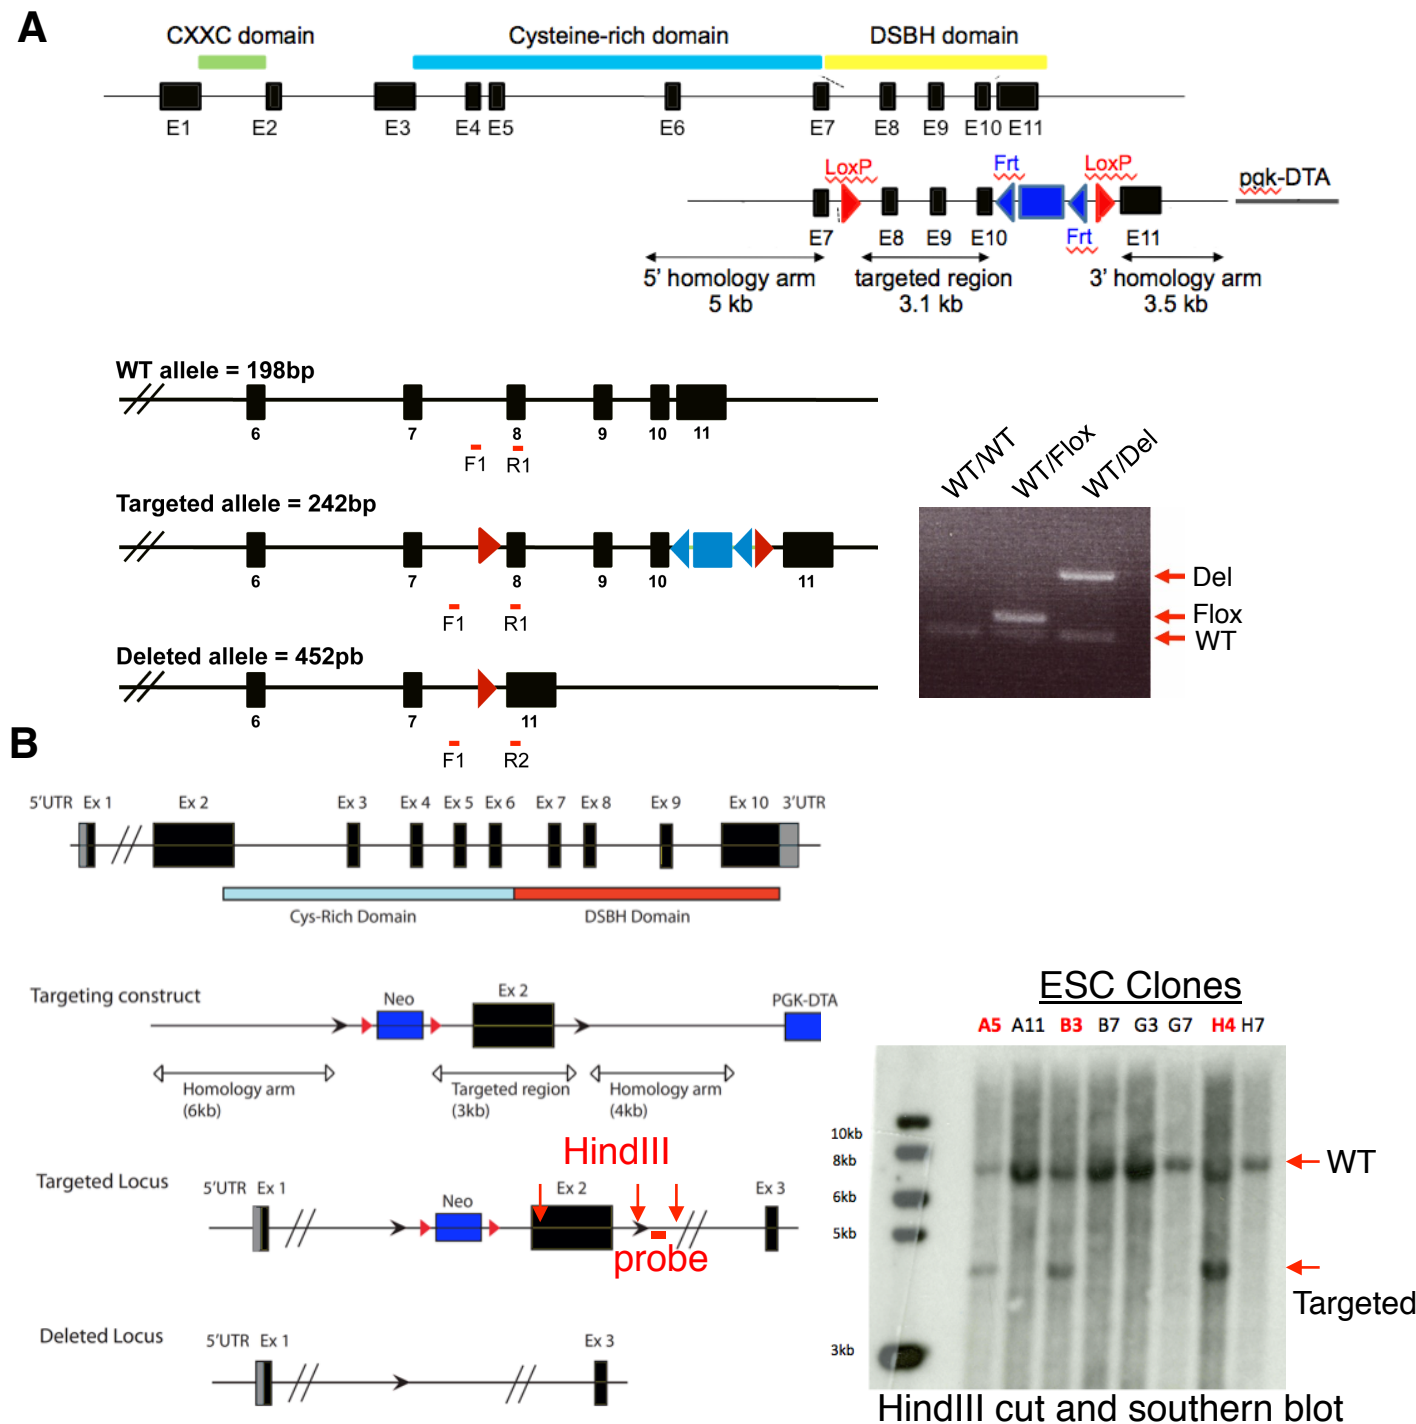

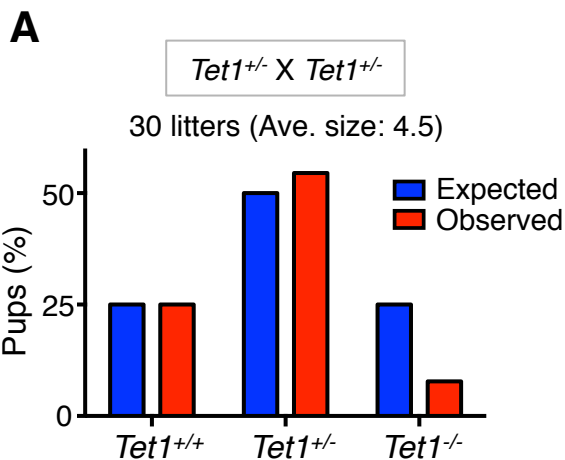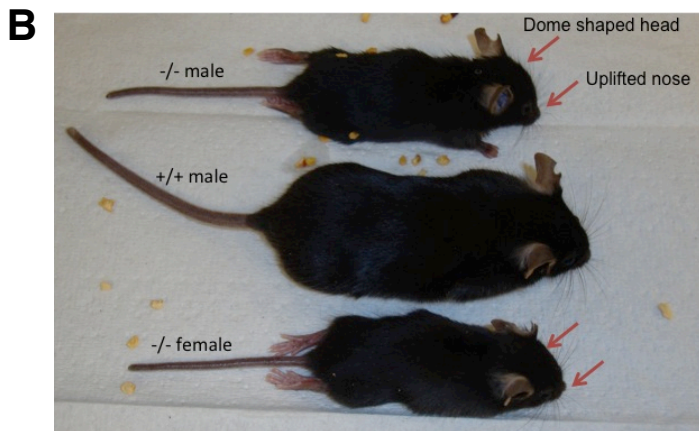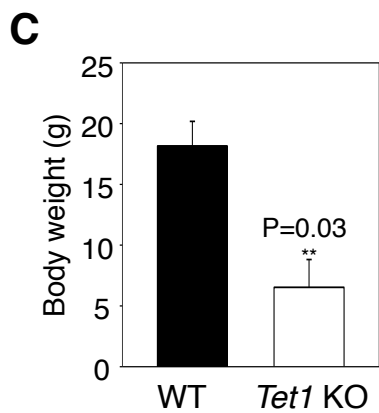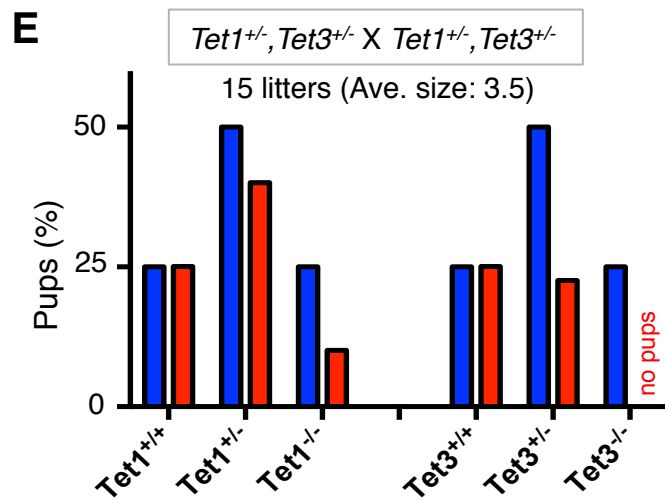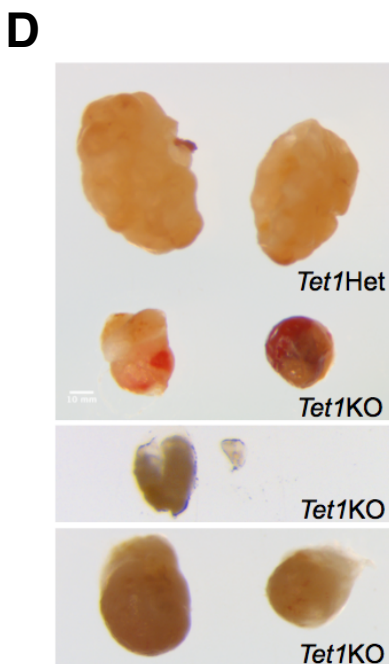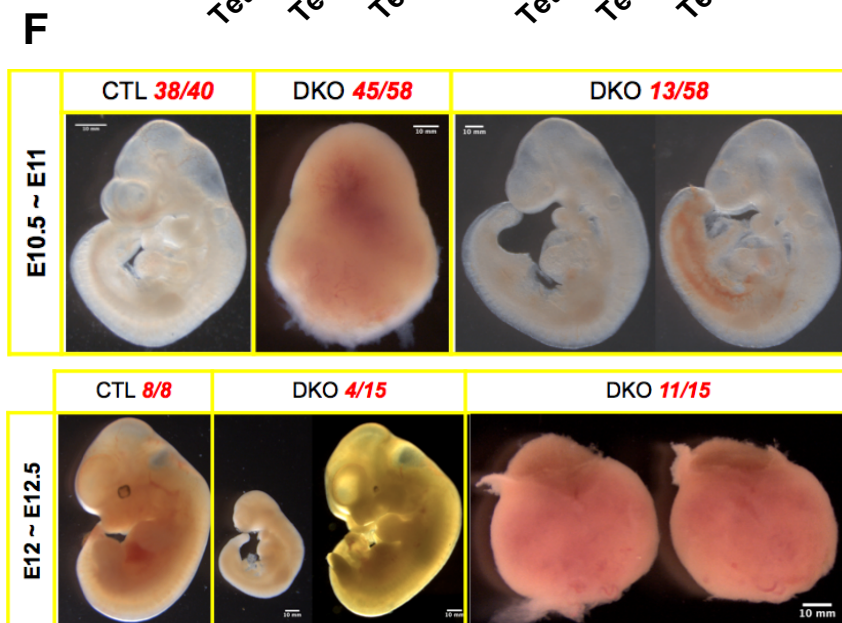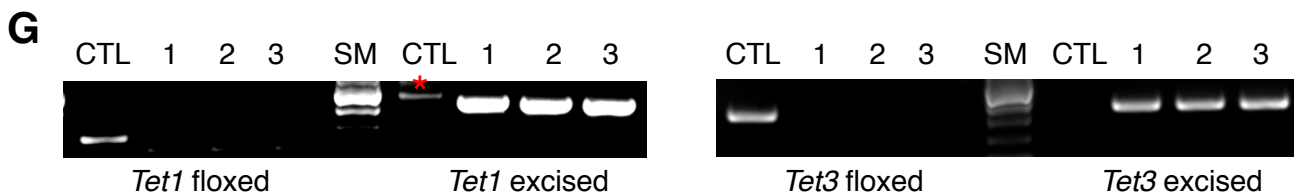

**Figure S3.** Phenotypes of *Tet1* KO and *Tet3* KO mice. **(A)** Bar graph summarizing frequency of *Tet1* genotypes from the *Tet1*<sup>+/-</sup> breedings (see **SI Appendix, Table S1**). **(B)** Whole body appearance of WT male and *Tet1* KO male and female mice (red arrows indicate typical symptoms of hydrocephaly). **(C)** Comparison of body weights of WT and *Tet1* KO mice (n=3). **(D)** *Tet1* Het and *Tet1* KO ovaries are dissected and compared (age of around 2.5 month). **(E)** Bar graph summarizing frequency of *Tet1* and *Tet3* genotypes from the *Tet1*<sup>+/-</sup>, *Tet3*<sup>+/-</sup> breedings (see **SI Appendix, Table S2**). Because the *Tet1* allele on chromosome 10 and the *Tet3* allele on chromosome 6 are independently inherited, their inheritance frequencies can be calculated separately. As previously noted (5), *Tet3*<sup>+/-</sup> matings yielded *Tet3*<sup>+/-</sup> and *Tet3*<sup>-/-</sup> pups at the expected Mendelian frequencies, but *Tet1*<sup>+/-</sup>, *Tet3*<sup>+/-</sup> double-heterozygous matings yielded no *Tet3*<sup>-/-</sup> pups and *Tet3*<sup>+/-</sup> pups were born at half the expected frequency, indicating that concurrent *Tet1* deficiency exacerbates the impaired phenotypes of mice carrying *Tet3* mutant alleles. **(F)** *Top row*, At E10.5~E11, 38/40 control (CTL) embryos had a normal appearance (*left*), but 45/58 *Tet1/3* DKO embryos were resorbed in decidua (*middle*), whereas the remaining 13/58 embryos appeared to be developing (*right*). *Bottom row*, At E12-E12.5, all CTL embryos were normal (*left*); *Tet1/3* DKO embryos appeared to be decaying and did not display any heartbeat (*middle*); were resorbed (*right*). **(G)** PCR genotyping for *Tet1* (*left*) and *Tet3* (*right*) alleles in E10.5 CTL and 3 *Tet1/3* DKO embryos. \* indicates nonspecific amplification with different size.



**A** MA plot for CTLs and *Tet1/3* DKOs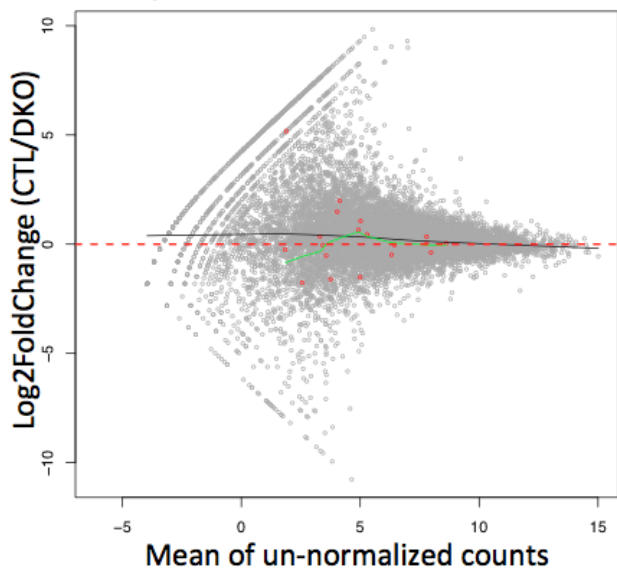**C** Group A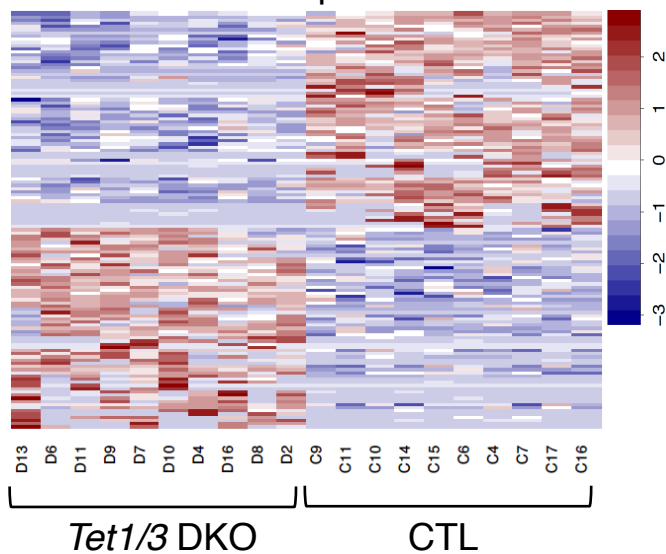**B**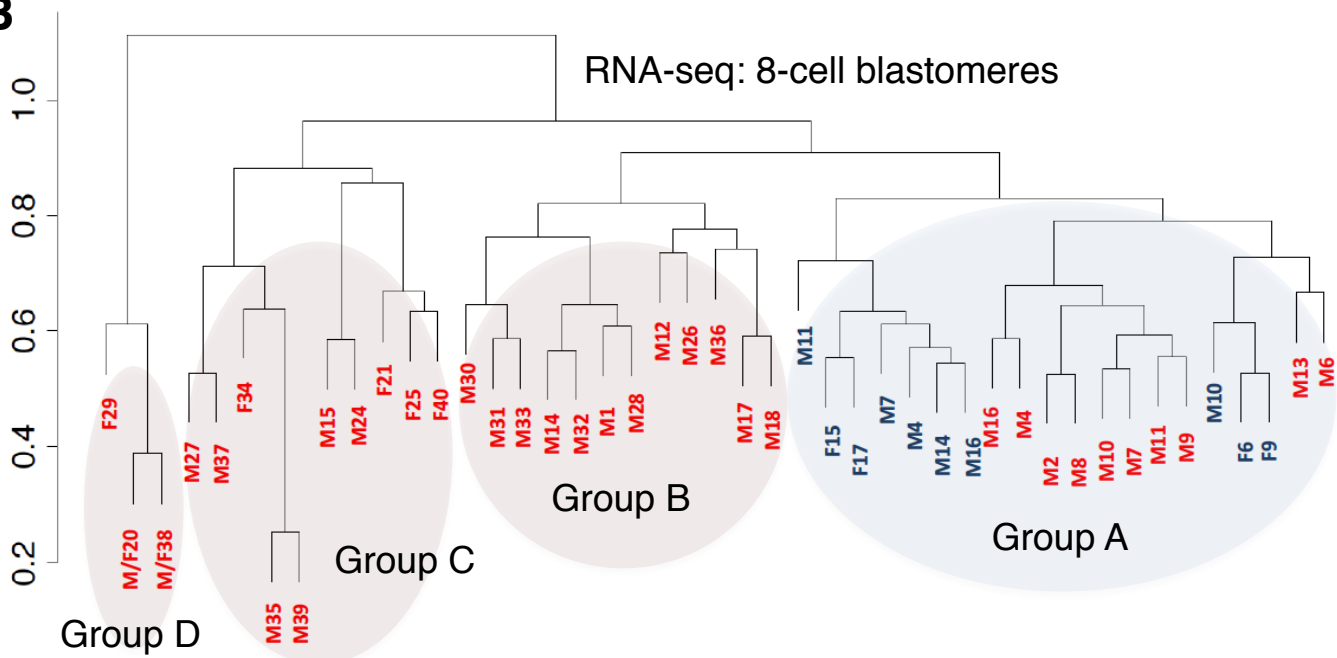**D**

## Group B

- cellular metabolic process 0.000182
- catabolic process 0.000565

## Group C

- cell cycle 5.17e-06
- cell division regulation 3.7e-05

## Group D

- negative regulation of cellular process 3.28e-09
- programmed cell death 1.14e-07
- cellular response to stress 6.8e-07

**E**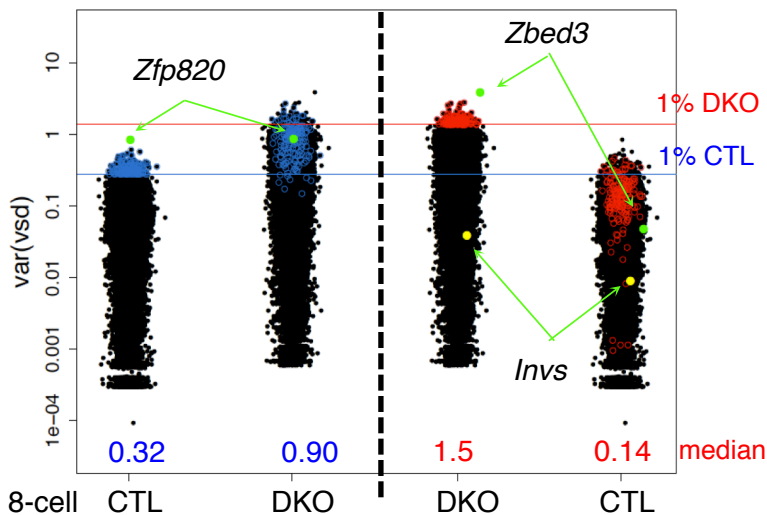

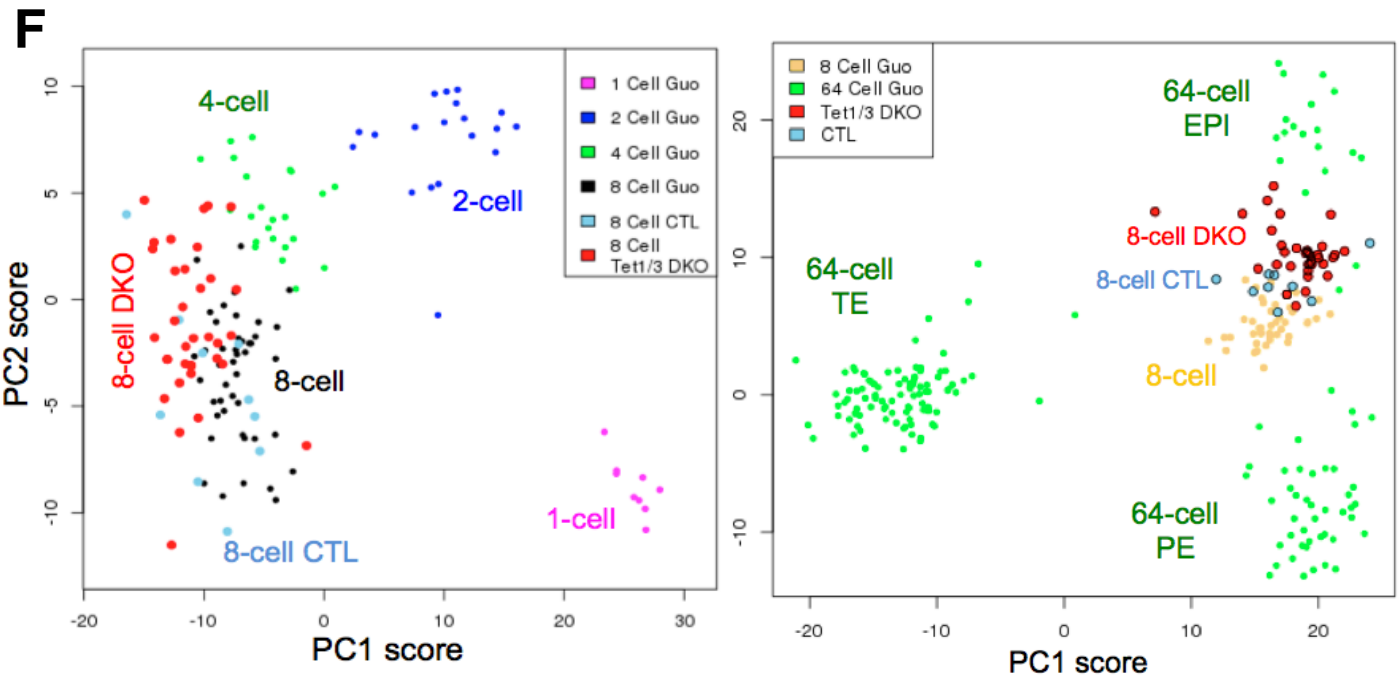

**Figure S4.** Analyses of RNA-seq data from single cells (blastomeres) of 8-cell embryos. **(A)** Log-scaled MA plot showing the FoldChange of un-normalized read counts (CTL, DKO) against average un-normalized read counts. The grey symbols represent the genes and red symbols represent the ERCC spike-ins. Only ERCC spike-ins with an average un-normalized read count greater than 2 were considered. The lines are the lowest local regression fits for genes (black) and spike-ins (green). The red spike-in controls are scattered around the zero line, indicating that there is no global increase of expression in the DKO group. **(B)** Unsupervised clustering analysis based on single-cell RNA-seq, using the top 400 differentially-expressed genes. Each blastomere is indicated by its number and sex (M/F, based on expression of sex chromosome genes shown in **SI Appendix, Figure S6C**). The dendrogram separates 4 distinct groups. **(C)** Heatmap of differentially expressed genes between the 10 CTL and 10 *Tet1/3* DKO blastomeres in Group A. **(D)** GO analysis was applied to the genes differentially expressed in groups B, C and D compared to group A, which includes all control blastomeres. The GO categories are displayed with p-values. **(E)** The top 1% of variable genes in CTL cells (*blue dots, left*) and *Tet1/3* DKO cells (*red dots, right*) are shown on the variance-stabilization dot plot. The median variances of these selected genes (blue and red dots) are shown at the bottom. The top variable genes (*Zfp820* and *Zbed3* in CTL and DKO blastomeres respectively) and a stably-expressed gene (*Invs*) are indicated; the expression levels of these genes are shown in **Figure 2E**. **(F)** *Left panel*, Expression levels of the 48 genes analyzed by Guo *et al.* (2010) were extracted from the RNA-seq data for the individual DKO and CTL blastomeres analyzed in this study, and projected onto a PCA plot of gene expression (RNA-seq) from the 1-cell (zygote) to the 8-cell embryo obtained by Guo *et al.* (2010). *Right panel*, A similar combined PCA plot that includes the 64-cell blastomere distribution pattern from Guo *et al.* (2010).

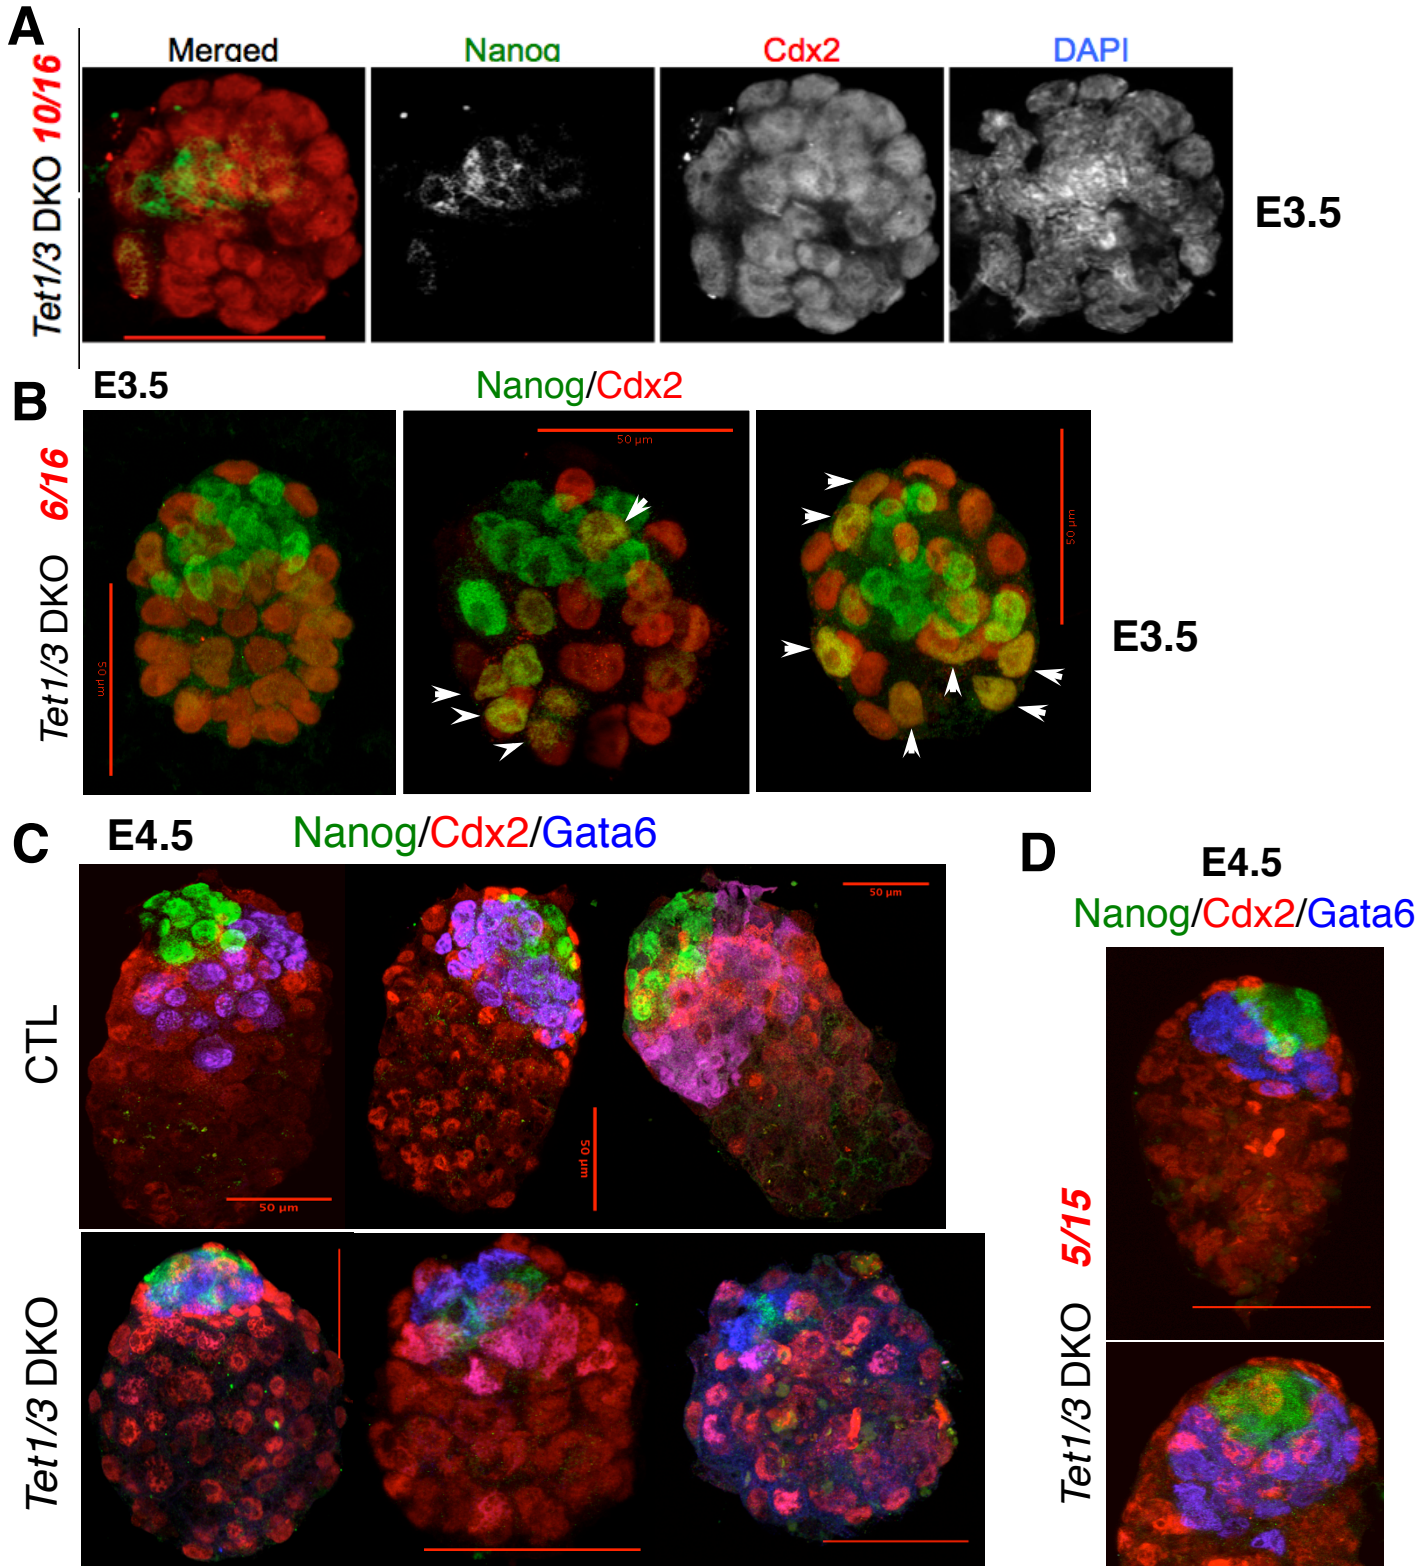

**Figure S5.** Additional examples of Nanog, Cdx2 and Gata6 staining at E3.5 and E4.5. **(A)** Another example of a failed *Tet1/3* DKO blastocyst stained for Nanog and Cdx2. **(B)** A few E3.5 *Tet1/3* DKO embryos show high levels of Nanog expression (6 out of 16 *Tet1/3* DKO embryos). Arrows indicate abnormal co-expression of Nanog and Cdx2. **(C)** Merged images of CTL (*top row*) and *Tet1/3* DKO (*bottom row*) E4.5 embryos stained for Nanog, Cdx2 and Gata6. **(D)** E4.5 *Tet1/3* DKOs with relatively normal appearance but abnormally small size, stained for Nanog, Cdx2 and Gata6 (5 out of 15 *Tet1/3* DKO embryos). Scale bar 50  $\mu$ m.

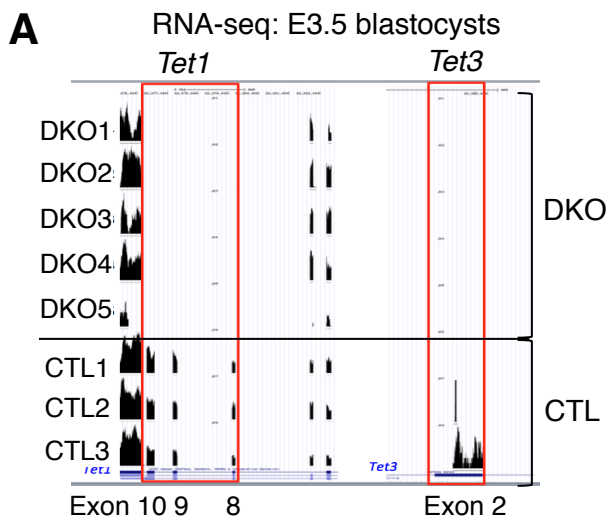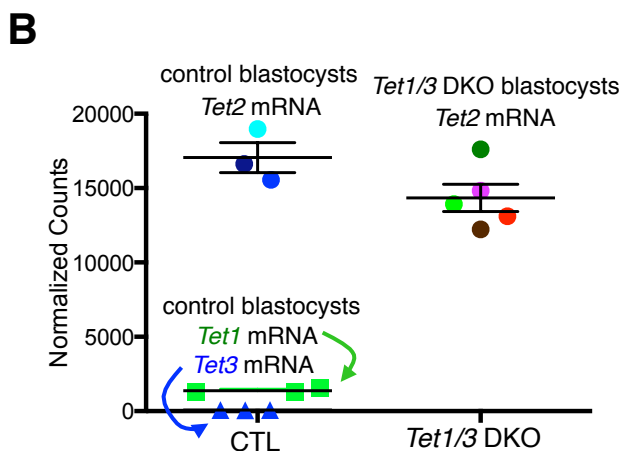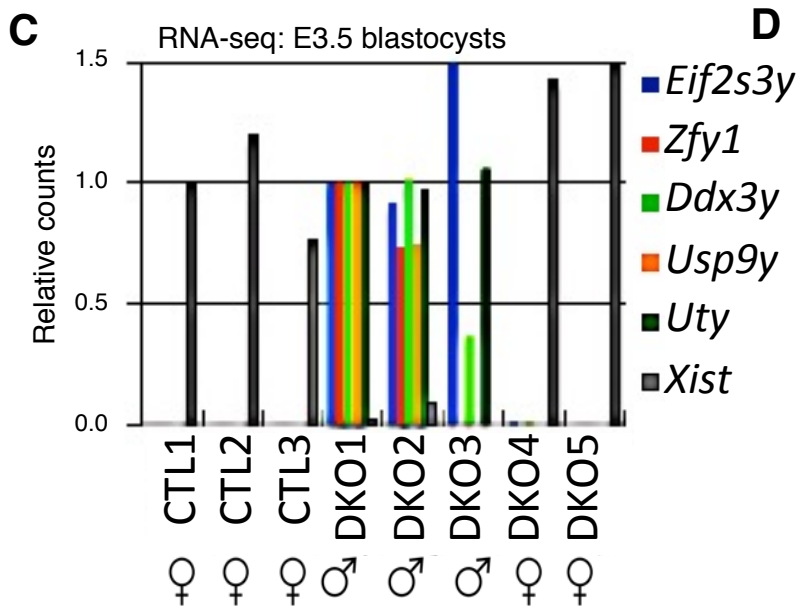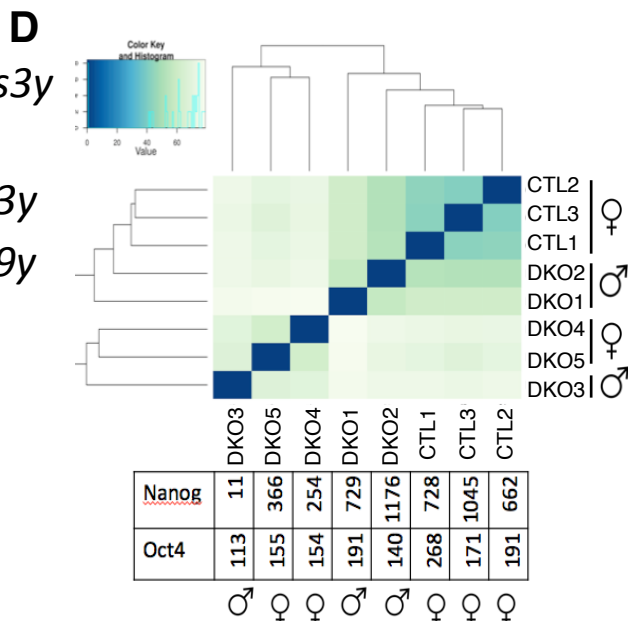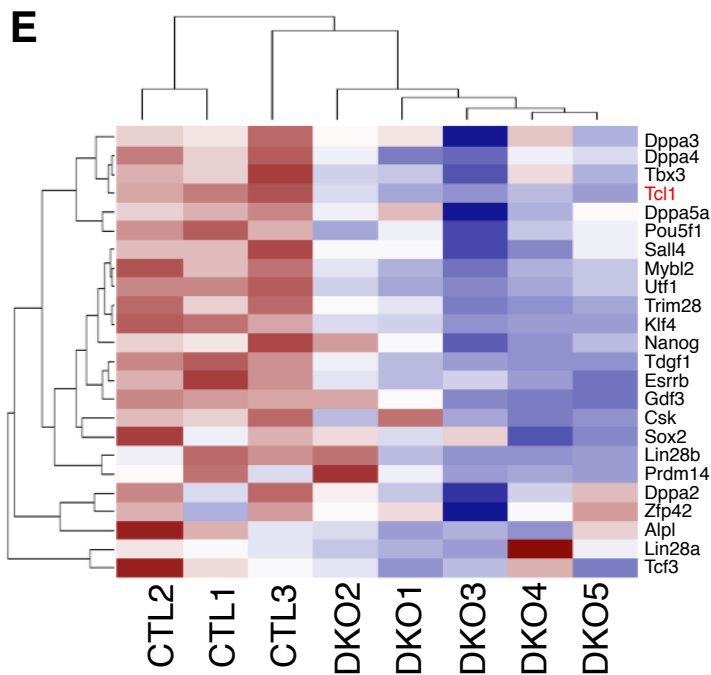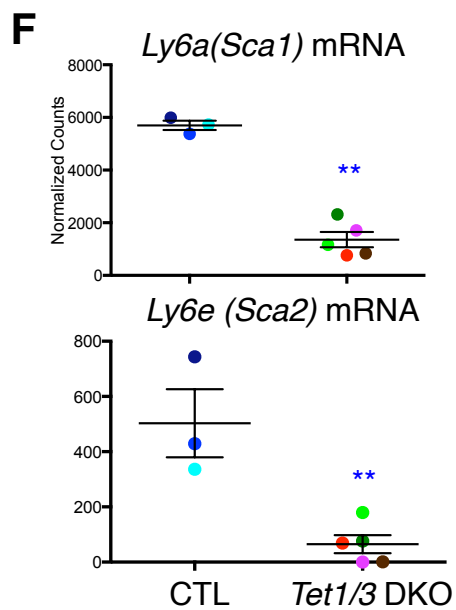

**Figure S6.** Analyses of single-embryo RNA-seq. **(A)** Genome browser snapshots showing RNA-seq reads for targeted exons of *Tet1* and *Tet3*. Reads corresponding to *Tet1* exons 9,10 and 11 and *Tet3* exon 2 are specifically missing in *Tet1/3* DKO blastocysts. The expression level of *Tet3* is very low, thus reads are only observed in 2/3 CTL embryos. **(B)** *Tet1*, *Tet2* and *Tet3* mRNA expression levels in CTL embryos and *Tet2* mRNA levels in *Tet1/3* DKO embryos assessed by RNA-seq. Note the high expression of *Tet2* mRNA relative to the low expression of *Tet1* mRNA and the almost absent expression of *Tet3* mRNA in CTL blastocysts. **(C)** Expression levels of Y chromosome genes and *Xist* from the RNA-seq data for each embryo. The sex of each embryo is determined by the pattern of expression of Y chromosome genes and *Xist*. **(D)** Unsupervised clustering of transcriptome data for 3 CTL and 5 *Tet1/3* DKO blastocysts. *Bottom*, the table shows the expression levels of *Nanog* and *Oct4* matched to the individual embryos on the cluster chart. **(E)** Heatmap showing expression of 24 different pluripotency-related genes in CTL and *Tet1/3* DKO blastocysts. The *Tcl1* gene is indicated in red. **(F)** *Ly6a* (*Sca1*, *top*) and *Ly6e* (*Sca2*, *bottom*) expression is significantly impaired in *Tet1/3* DKO embryos compared to controls (taken from RNA-seq data; adjusted p-value < 0.01).

**A**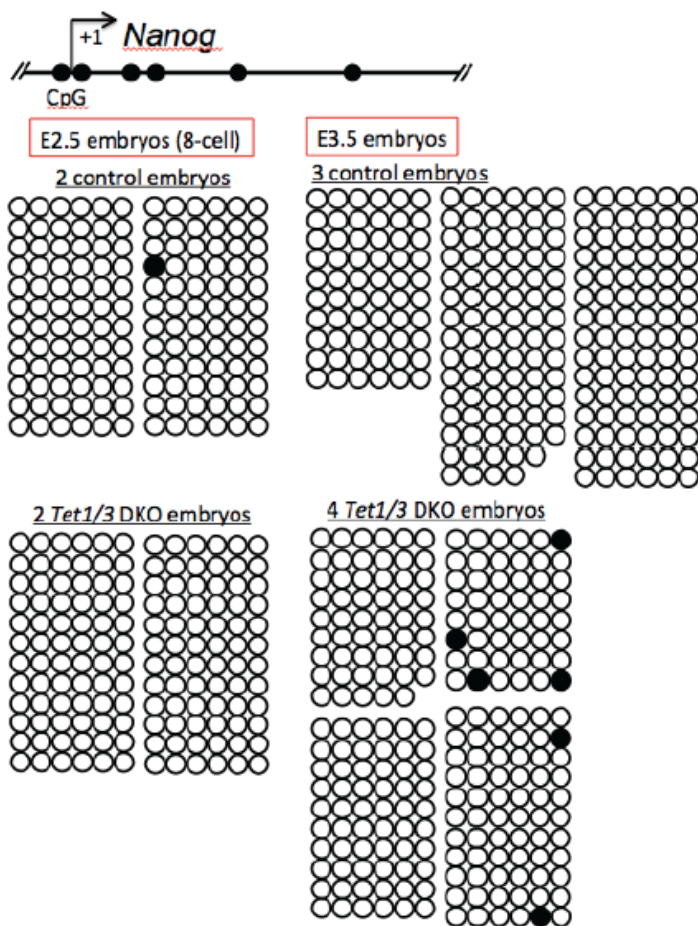**B**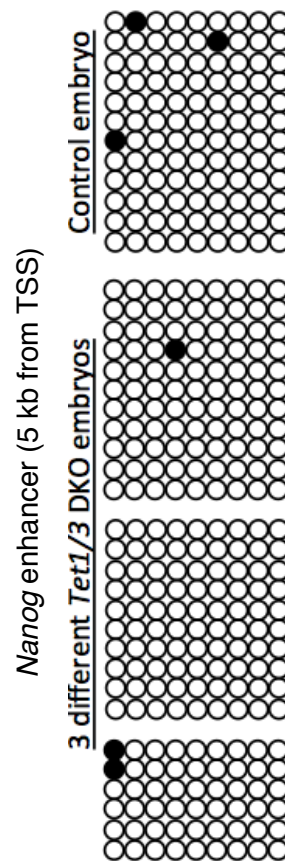**C**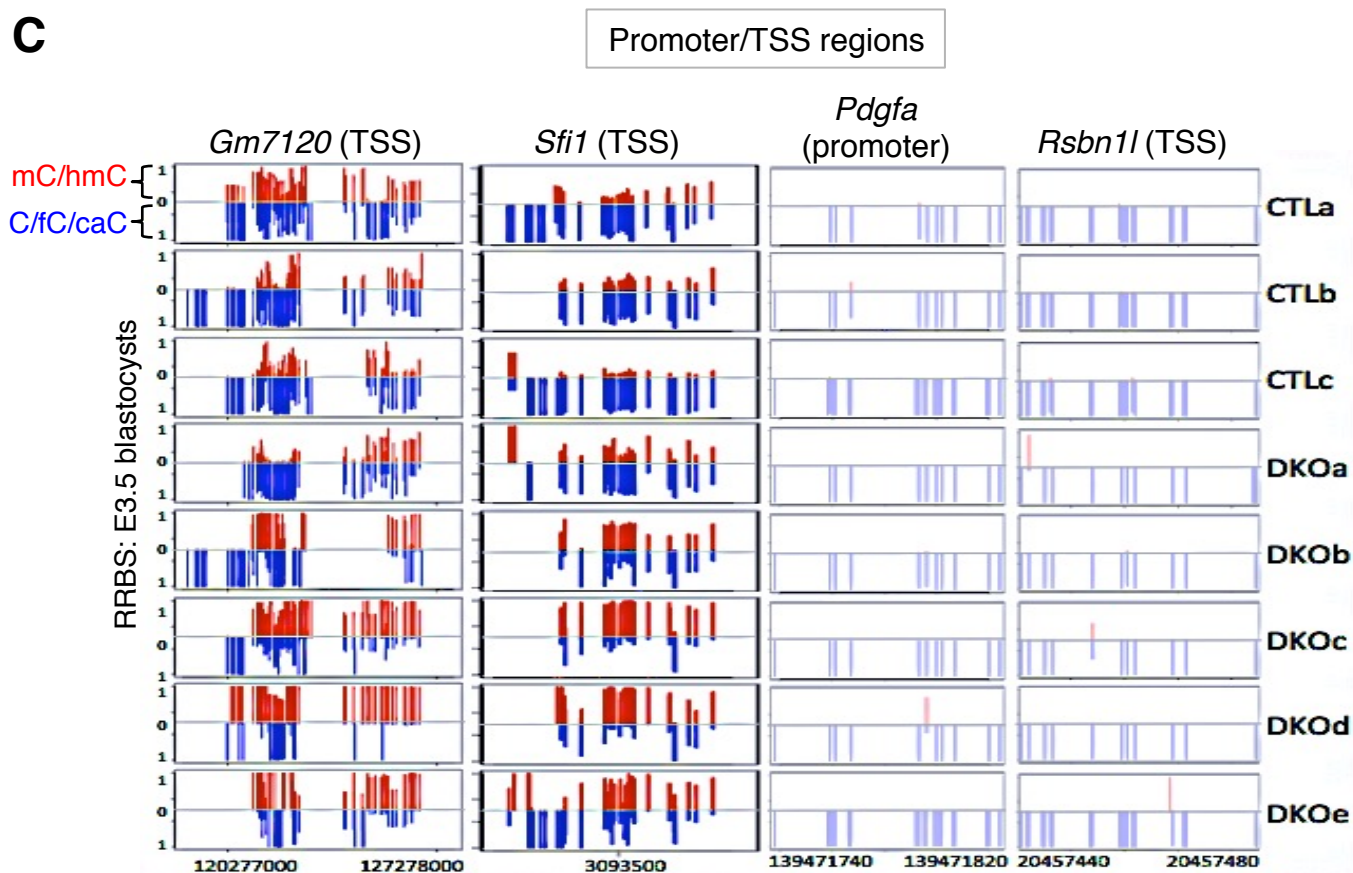

**Figure S7.** Analyses of DNA modifications in single-embryos. **(A)** Near-complete demethylation of the *Nanog* TSS region in several individual CTL and *Tet1/3* DKO embryos at both E2.5 and E3.5 stages. **(B)** Near-complete demethylation of the *Nanog* distal regulatory region, analyzed in 1 CTL and 3 *Tet1/3* DKO E3.5 embryos. **(C)** The promoter/TSS regions of *Gm7120*, *Sfi1*, *Pdgfa* and *Rsbn1l* show either variable DNA modification or nearly complete demethylation (C/5fC/5caC) in both control and *Tet1/3* DKO blastocysts as judged by RRBS. CpGs covered by at least 8 reads were analyzed and the fraction of unconverted (5mC+5hmC; *red bars*) and converted (C+5fC+5caC; *blue bars*) cytosines in CpGs is shown, with the summed length of the blue and red bars set at 1.

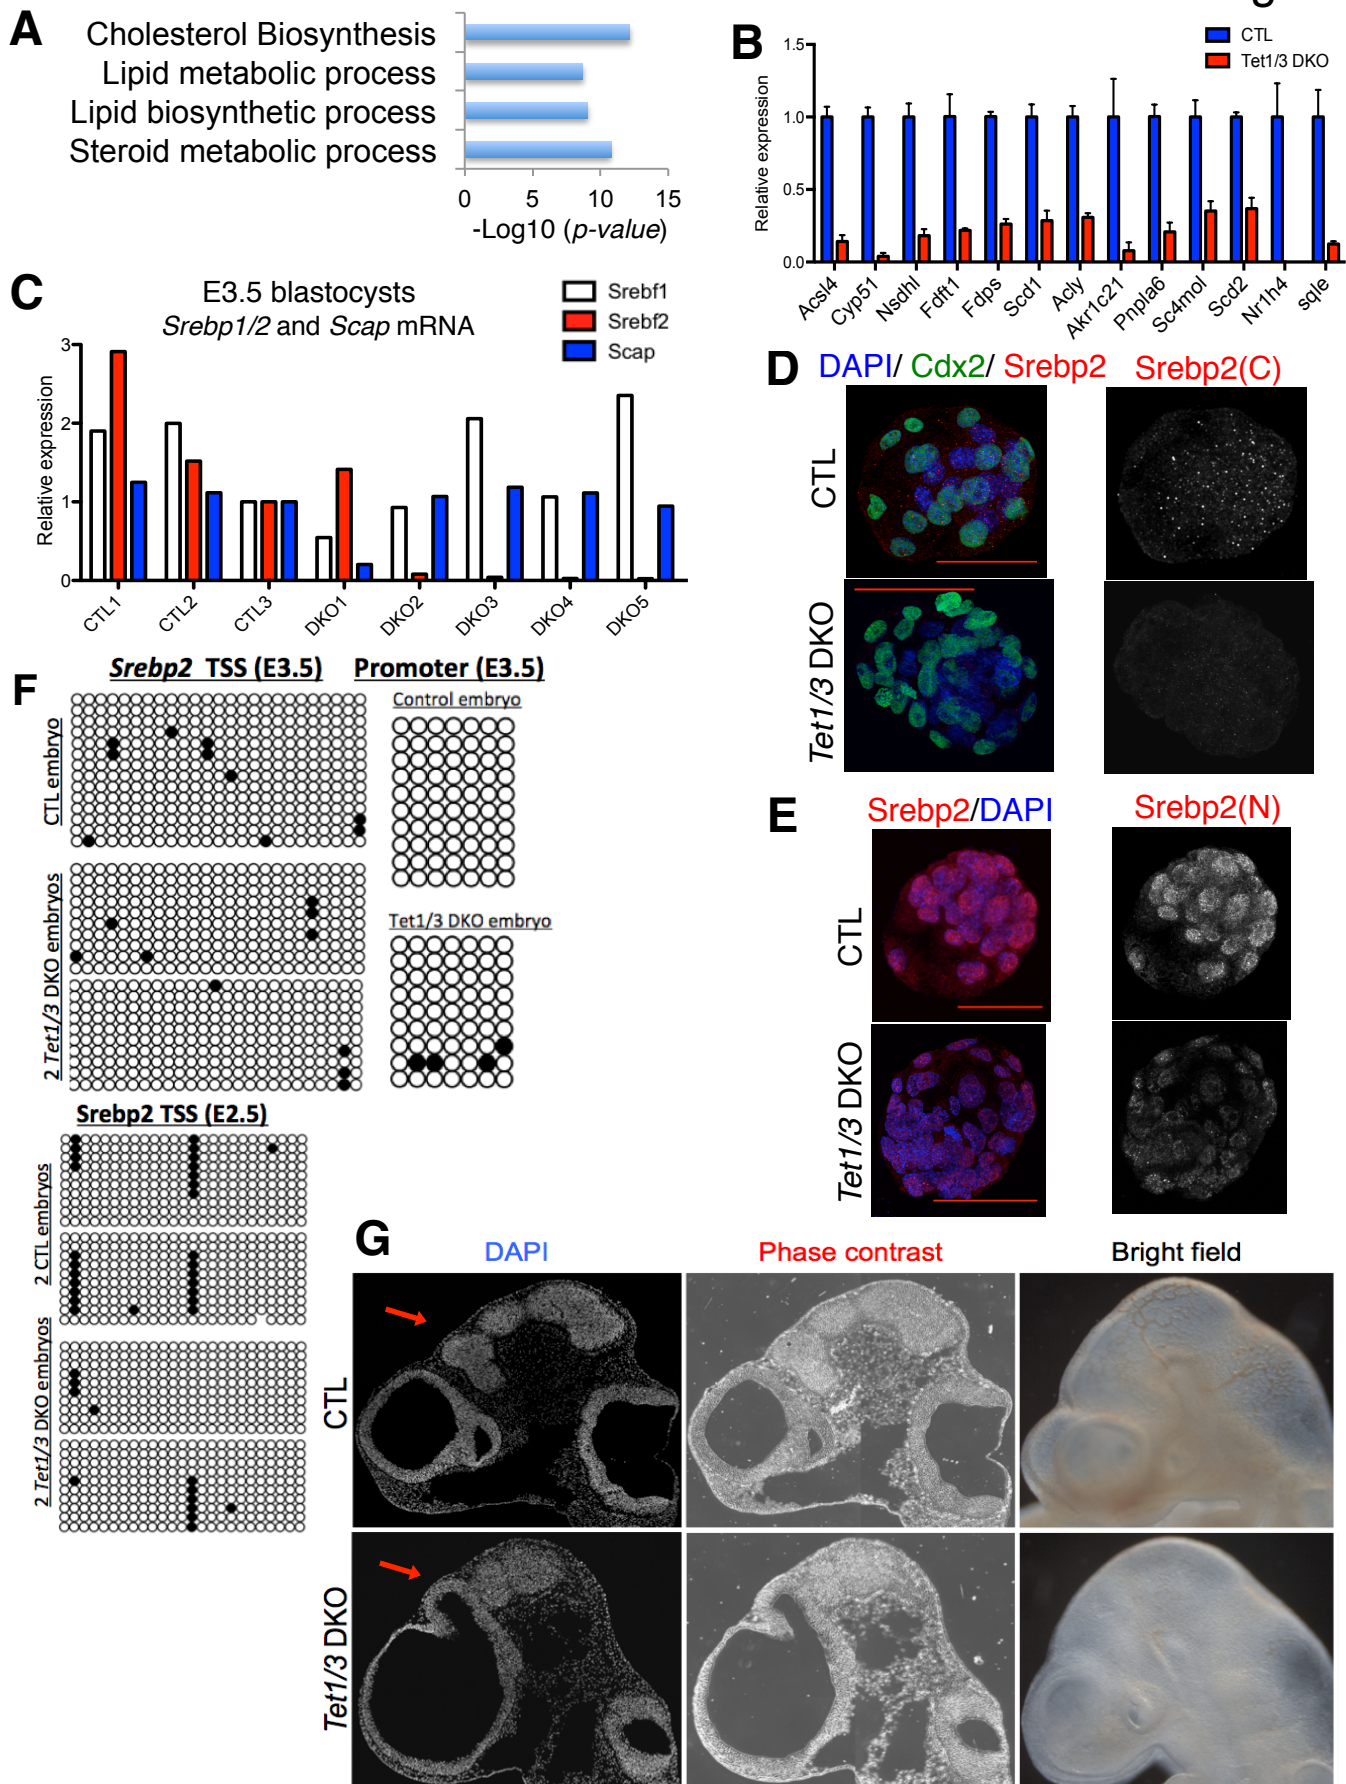



**H**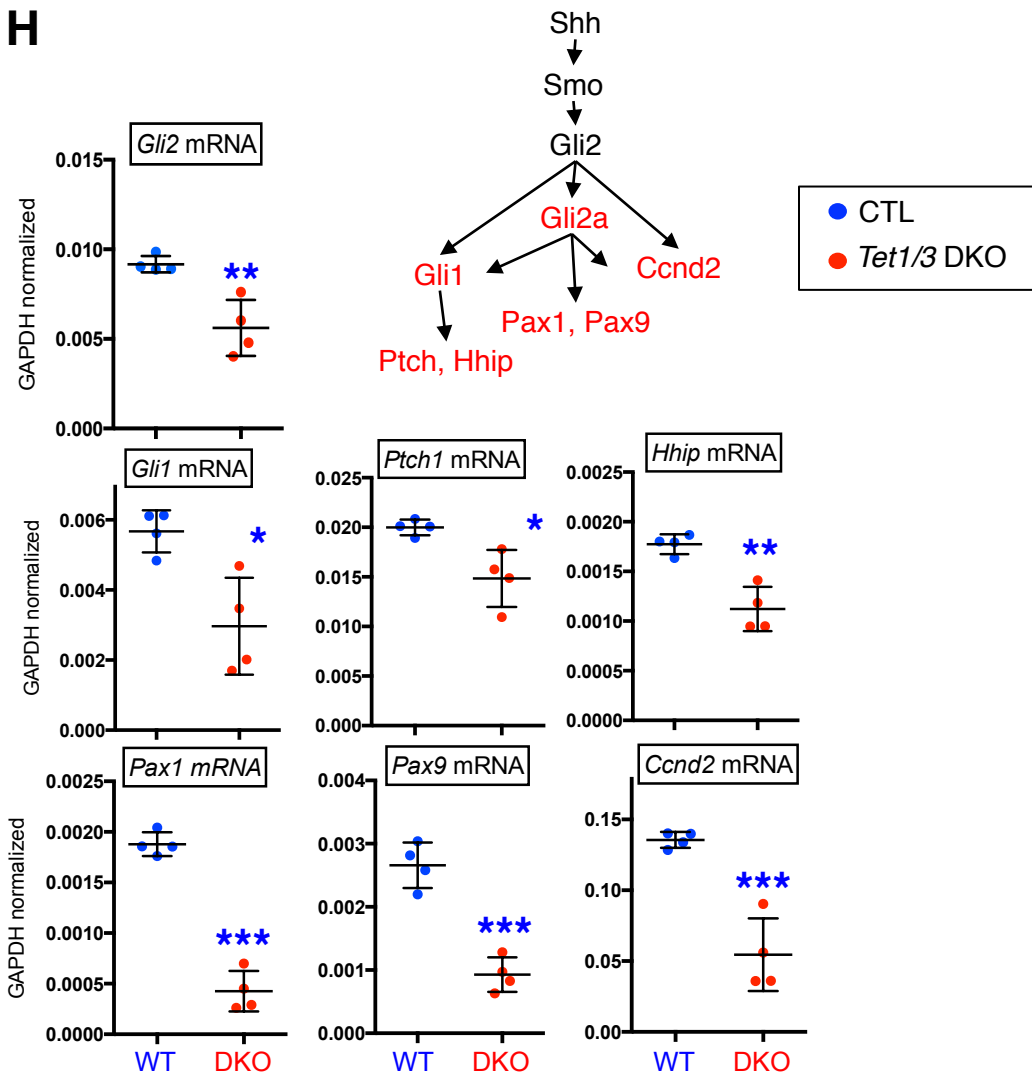

**Figure S8.** Genes whose expression is reproducibly downregulated in *Tet1/3* DKO compared to control embryos. **(A)** Gene ontology analysis using the 40 differentially expressed genes (adjusted p-value <0.01) identified the four indicated biological functions as the most significantly enriched categories. **(B)** Relative expression data for the 14 genes whose products are involved in regulating cellular lipid metabolism and cholesterol pathway. **(C)** The expression levels of *Srebf1/2* and *Scap* in individual blastocysts, plotted from RNA-seq data. **(D, E)** Immunocytochemistry of CTL and *Tet1/3* DKO blastocysts using *Srebp2* (C-terminus) and *Cdx2* antibodies **(D)** and *Srebp2* antibody (N-terminus) and DAPI **(E)**. The expression levels of *Srebp2* protein are substantially lower in *Tet1/3* DKO blastocysts compared to controls. **(F)** Near complete demethylation (C/5fC/5caC) of the *Srebp2* TSS and promoter regions in both CTL and *Tet1/3* DKO E3.5 blastocysts (*top panel*) and E2.5 8-cell embryos (*bottom panel*). **(G)** Abnormal development of the central nervous system in *Tet1/3* DKO E10.5 embryos compared to control (CTL) embryos, shown by cryosectioning and DAPI staining. Note the facial abnormalities and absence of the forebrain (*left, arrow*). **(H)** *Top*, Schematic of the Sonic Hedgehog (Shh) signaling pathway (adapted from (14)); *Bottom*, Downregulation of genes encoding the targets of the Shh signaling pathway *Gli1*, *Gli2*, *Ptch1*, *Hhip*, *Pax1*, *Pax9*, and *Ccnd2*, in four *Tet1/3* DKO E10.5 embryos compared to CTL, based on evaluation of mRNA expression by qPCR (\* p-value<0.05, \*\* p-value<0.01; \*\*\* p-value <0.005). Each dot represents an average of technical triplicates from a single embryo.

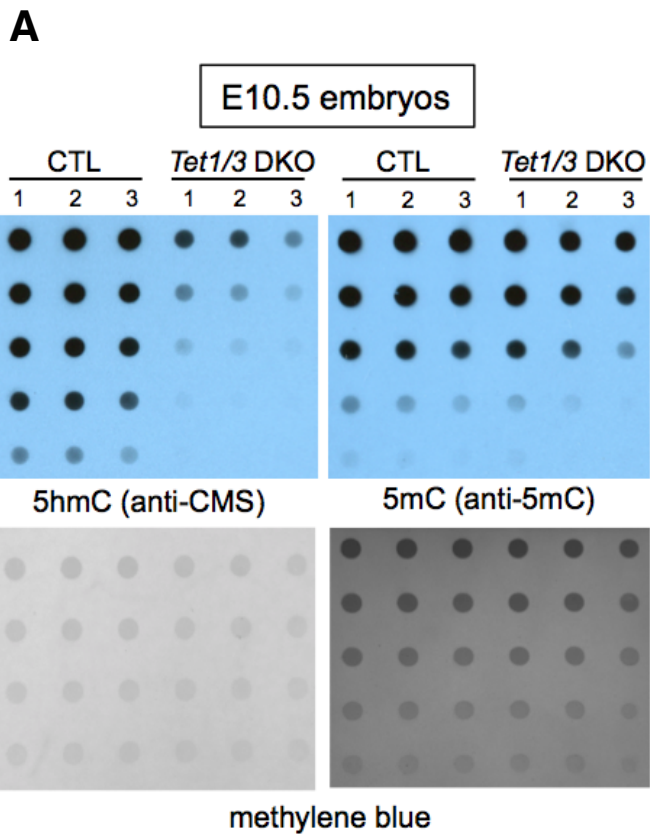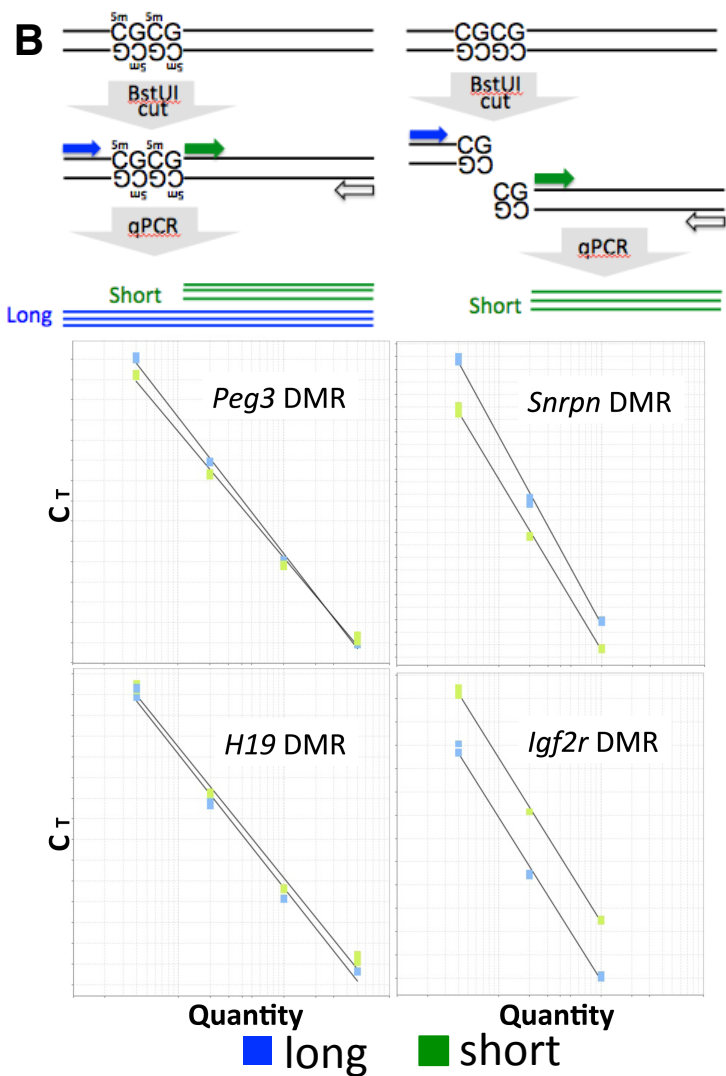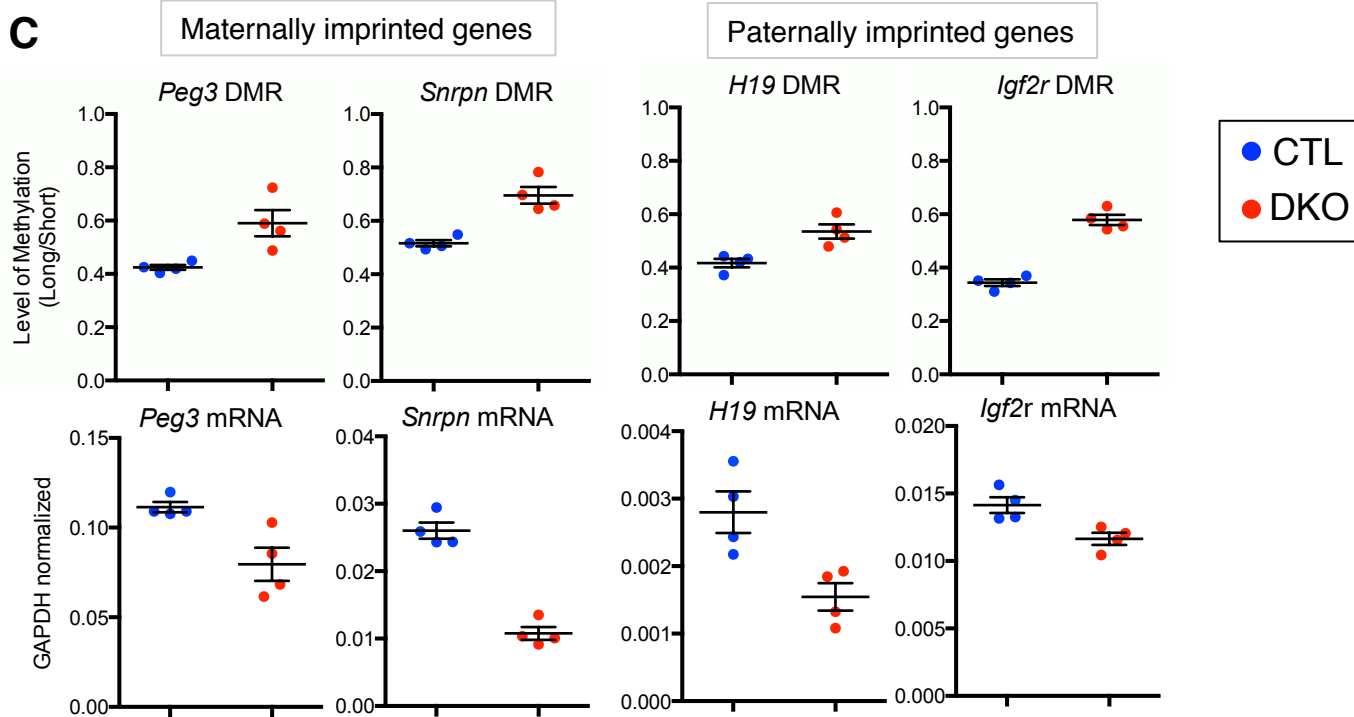

**Figure S9.** *Tet1* and *Tet3* regulate imprinted genes in the late embryogenesis. **(A)** Severe reduction of 5hmC with little effect on 5mC levels in three *Tet1/3* DKO E10.5 embryos compared to CTL, based on DNA dot blots to quantify 5mC and CMS (cytosine 5-methylenesulfonate, the derivative formed by reaction of 5hmC with sodium bisulfite (11)). Bottom panels show methylene blue staining of the same dot blots as a loading control. **(B)** *Top*, Schematic flow chart of methylation analysis using BstU1 (adapted from (13)); *bottom*, qPCR standard curves for 4 different DMR regions. **(C)** qPCR analyses of methylation levels (*top*) and mRNA levels (*bottom*) for paternally and maternally imprinted genes in 4 different CTL and *Tet1/3* DKO E10.5 embryos.

**Table S1.** *Tet1*KO embryos show partial embryonic lethality. The table shows the genotypes of pups produced by crossing *Tet1*<sup>+/-</sup> mice. A total of 30 litters were collected from 8 different crosses.

***Tet1*<sup>+/-</sup> X *Tet1*<sup>+/-</sup>**

| <b>Litter</b> | <b><i>Tet1</i><sup>+/+</sup></b> | <b><i>Tet1</i><sup>+/-</sup></b> | <b><i>Tet1</i><sup>-/-</sup></b> | <b>TOTAL</b>                |
|---------------|----------------------------------|----------------------------------|----------------------------------|-----------------------------|
| 1             |                                  | 5                                |                                  | 5                           |
| 2             |                                  | 6                                |                                  | 6                           |
| 3             |                                  | 4                                |                                  | 4                           |
| 4             |                                  | 5                                |                                  | 5                           |
| 5             | 1                                | 1                                | 2                                | 4                           |
| 6             |                                  | 2                                | 1                                | 3                           |
| 7             | 3                                | 2                                |                                  | 5                           |
| 8             | 1                                | 3                                |                                  | 4                           |
| 9             | 1                                | 4                                |                                  | 5                           |
| 10            |                                  | 3                                | 2                                | 5                           |
| 11            | 2                                | 1                                | 2                                | 5                           |
| 12            | 1                                | 2                                | 1                                | 4                           |
| 13            | 1                                | 3                                | 1                                | 5                           |
| 14            | 4                                | 2                                |                                  | 6                           |
| 15            |                                  | 5                                |                                  | 5                           |
| 16            | 3                                | 2                                | 1                                | 6                           |
| 17            | 2                                | 5                                |                                  | 7                           |
| 18            | 2                                | 3                                |                                  | 5                           |
| 19            | 1                                | 1                                | 1                                | 3                           |
| 20            | 1                                | 3                                |                                  | 4                           |
| 21            | 3                                | 2                                |                                  | 5                           |
| 22            | 1                                | 3                                |                                  | 4                           |
| 23            | 2                                | 1                                |                                  | 3                           |
| 24            | 2                                | 3                                |                                  | 5                           |
| 25            |                                  | 4                                |                                  | 4                           |
| 26            |                                  | 2                                |                                  | 2                           |
| 27            |                                  | 3                                |                                  | 3                           |
| 28            | 1                                | 3                                | 1                                | 5                           |
| 29            | 4                                | 1                                |                                  | 5                           |
| 30            | 3                                | 1                                |                                  | 4                           |
| <b>Total</b>  | <b>39</b>                        | <b>85</b>                        | <b>12</b>                        | <b>4.5<br/>(Ave Litter)</b> |
| <b>Ratio</b>  | <b>1 : 2.18 : 0.31</b>           |                                  |                                  |                             |

**Table S2.** Embryonic lethality of *Tet1/3* DKO embryos. Genotypes of pups produced by crossing *Tet1<sup>+/-</sup>; Tet3<sup>+/-</sup>* mice. A total of 15 litters were evaluated.

***Tet1<sup>+/-</sup>;Tet3<sup>+/-</sup> X Tet1<sup>+/-</sup>;Tet3<sup>+/-</sup>***

| Litter       | Size | Genotype                                                                                                               |
|--------------|------|------------------------------------------------------------------------------------------------------------------------|
| 1            | 4    | WT(1), <i>Tet1<sup>+/-</sup></i> (1), <i>Tet1<sup>KO</sup></i> (2)                                                     |
| 2            | 2    | <i>Tet1<sup>+/-</sup>;Tet3<sup>+/-</sup></i> (2)                                                                       |
| 3            | 3    | <i>Tet1<sup>+/-</sup></i> (1), <i>Tet1<sup>+/-</sup>;Tet3<sup>+/-</sup></i> (2)                                        |
| 4            | 2    | <i>Tet1<sup>+/-</sup></i> (1), <i>Tet1<sup>KO</sup>;Tet3<sup>+/-</sup></i> (1)                                         |
| 5            | 5    | WT(1), <i>Tet1<sup>+/-</sup></i> (1), <i>Tet1<sup>+/-</sup>;Tet3<sup>+/-</sup></i> (3)                                 |
| 6            | 4    | WT(2), <i>Tet1<sup>+/-</sup></i> (1), <i>Tet1<sup>+/-</sup>;Tet3<sup>+/-</sup></i> (1)                                 |
| 7            | 4    | WT(1), <i>Tet1<sup>+/-</sup></i> (1), <i>Tet3<sup>+/-</sup></i> (2)                                                    |
| 8            | 3    | WT(1), <i>Tet1<sup>+/-</sup>;Tet3<sup>+/-</sup></i> (1), <i>Tet1<sup>KO</sup></i> (1)                                  |
| 9            | 5    | WT(1), <i>Tet1<sup>+/-</sup>;Tet3<sup>+/-</sup></i> (1), <i>Tet1<sup>+/-</sup></i> (1), <i>Tet3<sup>+/-</sup></i> (2)  |
| 10           | 2    | <i>Tet1<sup>+/-</sup>;Tet3<sup>+/-</sup></i> (2)                                                                       |
| 11           | 5    | WT(1), <i>Tet1<sup>+/-</sup></i> (2), <i>Tet1<sup>KO</sup></i> (1), <i>Tet3<sup>+/-</sup></i> (1)                      |
| 12           | 2    | <i>Tet1<sup>+/-</sup></i> (1), <i>Tet3<sup>+/-</sup></i> (1)                                                           |
| 13           | 2    | <i>Tet1<sup>+/-</sup></i> (1), <i>Tet3<sup>+/-</sup></i> (1)                                                           |
| 14           | 4    | <i>Tet1<sup>KO</sup></i> (1), <i>Tet3<sup>+/-</sup></i> (1), <i>Tet1<sup>+/-</sup>;Tet3<sup>+/-</sup></i> (2)          |
| 15           | 5    | <i>Tet1<sup>+/-</sup></i> (3), <i>Tet1<sup>KO</sup></i> (1), <i>Tet3<sup>+/-</sup></i> (1)                             |
| Ave.<br>Size | 3.5  | <i>Tet1</i> WT: Het: KO = 17: 28: 7 ( <b>1: 1.6: 0.4</b> )<br><i>Tet3</i> WT: Het: KO = 28: 24: 0 ( <b>1: 0.9: 0</b> ) |

**Table S3. Quality control data for single-cell RNA-seq.**

| Library/Sample | Total Raw Reads | Reads Not Passing Filters | Reads Not Passing Filters % | Reads Passing Filters | Reads Passing Filters % | Total mapping to Spike-in Control | Total mapping to Spike-in Control % | Total mapping to tRNA/rRNA | Total mapping to tRNA/rRNA % | Total mapping to Adaptors | Total mapping to Adaptors % | Total mapping to low-complexity reads | Total mapping to low-complexity reads % | Total mapping to reference | Total mapping to reference % | Total uniquely mapping Reads | Total uniquely mapping Reads % | Total unmapped | Total unmapped % |
|----------------|-----------------|---------------------------|-----------------------------|-----------------------|-------------------------|-----------------------------------|-------------------------------------|----------------------------|------------------------------|---------------------------|-----------------------------|---------------------------------------|-----------------------------------------|----------------------------|------------------------------|------------------------------|--------------------------------|----------------|------------------|
| Library1:C4    | 6,916,857       | 681,025                   | 9.85%                       | 6,235,832             | 90.15%                  | 430                               | 0.01%                               | 95,015                     | 1.52%                        | 0                         | 0.00%                       | 143,066                               | 2.29%                                   | 5,477,746                  | 87.84%                       | 5,103,025                    | 81.83%                         | 519,575        | 8.33%            |
| Library10:C6   | 8,181,847       | 969,457                   | 11.85%                      | 7,212,390             | 88.15%                  | 1,637                             | 0.02%                               | 90,721                     | 1.26%                        | 0                         | 0.00%                       | 144,086                               | 2.00%                                   | 6,276,619                  | 87.03%                       | 5,822,751                    | 80.73%                         | 699,327        | 9.70%            |
| Library11:C14  | 8,292,540       | 1,032,379                 | 12.45%                      | 7,260,161             | 87.55%                  | 2,983                             | 0.04%                               | 186,731                    | 2.57%                        | 0                         | 0.00%                       | 161,029                               | 2.22%                                   | 6,243,174                  | 85.99%                       | 5,818,626                    | 80.15%                         | 666,244        | 9.18%            |
| Library12:D2   | 6,016,934       | 587,547                   | 9.77%                       | 5,429,387             | 90.24%                  | 821                               | 0.02%                               | 65,618                     | 1.21%                        | 0                         | 0.00%                       | 104,291                               | 1.92%                                   | 4,754,929                  | 87.58%                       | 4,391,074                    | 80.88%                         | 503,728        | 9.28%            |
| Library13:D9   | 9,242,595       | 1,118,947                 | 12.11%                      | 8,123,648             | 87.89%                  | 1,938                             | 0.02%                               | 194,772                    | 2.40%                        | 0                         | 0.00%                       | 154,989                               | 1.91%                                   | 7,023,394                  | 86.46%                       | 6,464,795                    | 79.58%                         | 748,555        | 9.28%            |
| Library14:D14  | 9,300,113       | 1,071,406                 | 11.52%                      | 8,228,707             | 88.48%                  | 2,017                             | 0.03%                               | 186,349                    | 2.27%                        | 0                         | 0.00%                       | 162,818                               | 1.98%                                   | 7,070,560                  | 85.93%                       | 6,403,878                    | 77.82%                         | 806,963        | 9.81%            |
| Library15:D20  | 7,585,703       | 896,849                   | 11.82%                      | 6,688,854             | 88.18%                  | 155                               | 0.00%                               | 111,767                    | 1.67%                        | 0                         | 0.00%                       | 134,003                               | 2.00%                                   | 5,928,763                  | 88.64%                       | 5,421,082                    | 81.05%                         | 514,166        | 7.69%            |
| Library16:D27  | 11,027,614      | 1,366,280                 | 12.39%                      | 9,661,334             | 87.61%                  | 1,689                             | 0.02%                               | 196,862                    | 2.04%                        | 0                         | 0.00%                       | 184,029                               | 1.91%                                   | 8,210,676                  | 84.99%                       | 7,540,370                    | 78.05%                         | 1,068,078      | 11.06%           |
| Library17:D32  | 7,636,116       | 931,081                   | 12.19%                      | 6,705,035             | 87.81%                  | 1,947                             | 0.03%                               | 130,158                    | 1.94%                        | 0                         | 0.00%                       | 121,738                               | 1.82%                                   | 5,829,277                  | 86.94%                       | 5,376,015                    | 80.18%                         | 621,915        | 9.28%            |
| Library18:D37  | 9,212,512       | 1,022,738                 | 11.10%                      | 8,189,774             | 88.90%                  | 828                               | 0.01%                               | 201,702                    | 2.46%                        | 0                         | 0.00%                       | 149,283                               | 1.82%                                   | 7,064,050                  | 86.26%                       | 6,479,427                    | 79.12%                         | 773,911        | 9.45%            |
| Library19:C7   | 8,287,875       | 963,850                   | 11.63%                      | 7,324,025             | 88.37%                  | 1,618                             | 0.02%                               | 60,073                     | 0.82%                        | 0                         | 0.00%                       | 143,849                               | 1.96%                                   | 6,460,535                  | 88.21%                       | 5,851,364                    | 79.89%                         | 657,950        | 8.98%            |
| Library2:C11   | 6,303,010       | 651,980                   | 10.34%                      | 5,651,030             | 89.66%                  | 1,318                             | 0.02%                               | 109,203                    | 1.93%                        | 0                         | 0.00%                       | 109,415                               | 1.94%                                   | 4,925,166                  | 87.16%                       | 4,537,595                    | 80.30%                         | 505,928        | 8.95%            |
| Library20:C15  | 6,853,283       | 860,695                   | 12.56%                      | 5,992,588             | 87.44%                  | 2,184                             | 0.04%                               | 172,649                    | 2.88%                        | 0                         | 0.00%                       | 125,823                               | 2.10%                                   | 5,120,759                  | 85.45%                       | 4,787,895                    | 79.90%                         | 571,173        | 9.53%            |
| Library21:D4   | 7,339,287       | 793,674                   | 10.81%                      | 6,545,613             | 89.19%                  | 1,501                             | 0.02%                               | 117,254                    | 1.79%                        | 0                         | 0.00%                       | 124,222                               | 1.90%                                   | 5,722,409                  | 87.42%                       | 5,276,970                    | 80.62%                         | 580,227        | 8.86%            |
| Library22:D10  | 9,019,307       | 1,078,676                 | 11.96%                      | 7,940,631             | 88.04%                  | 3,088                             | 0.04%                               | 203,448                    | 2.56%                        | 0                         | 0.00%                       | 156,179                               | 1.97%                                   | 6,848,135                  | 86.24%                       | 6,341,967                    | 79.87%                         | 729,781        | 9.19%            |
| Library23:D15  | 7,540,189       | 890,088                   | 11.81%                      | 6,650,101             | 88.20%                  | 870                               | 0.01%                               | 165,313                    | 2.49%                        | 0                         | 0.00%                       | 142,320                               | 2.14%                                   | 5,726,537                  | 86.11%                       | 5,340,566                    | 80.31%                         | 615,061        | 9.25%            |
| Library24:D21  | 7,634,388       | 893,649                   | 11.71%                      | 6,740,739             | 88.29%                  | 1,284                             | 0.02%                               | 124,108                    | 1.84%                        | 0                         | 0.00%                       | 128,558                               | 1.91%                                   | 5,859,870                  | 86.93%                       | 5,435,072                    | 80.63%                         | 626,919        | 9.30%            |
| Library25:D28  | 9,799,325       | 1,203,147                 | 12.28%                      | 8,596,178             | 87.72%                  | 2,304                             | 0.03%                               | 169,273                    | 1.97%                        | 0                         | 0.00%                       | 168,968                               | 1.97%                                   | 7,355,268                  | 86.26%                       | 6,721,199                    | 78.19%                         | 900,365        | 10.47%           |
| Library26:D33  | 9,241,188       | 1,079,344                 | 11.68%                      | 8,161,844             | 88.32%                  | 3,205                             | 0.04%                               | 241,730                    | 2.96%                        | 0                         | 0.00%                       | 142,867                               | 1.75%                                   | 7,001,195                  | 85.78%                       | 6,310,656                    | 77.32%                         | 772,847        | 9.47%            |
| Library27:D38  | 6,576,598       | 738,030                   | 11.22%                      | 5,838,568             | 88.78%                  | 754                               | 0.01%                               | 120,640                    | 2.07%                        | 0                         | 0.00%                       | 104,960                               | 1.80%                                   | 5,200,419                  | 89.07%                       | 4,806,648                    | 82.33%                         | 411,795        | 7.05%            |
| Library28:C9   | 7,446,992       | 654,664                   | 8.79%                       | 6,792,328             | 91.21%                  | 895                               | 0.01%                               | 82,732                     | 1.22%                        | 0                         | 0.00%                       | 126,663                               | 1.87%                                   | 5,991,962                  | 88.22%                       | 5,588,468                    | 82.28%                         | 590,076        | 8.69%            |
| Library29:C16  | 8,155,254       | 720,184                   | 8.83%                       | 7,435,070             | 91.17%                  | 1,733                             | 0.02%                               | 240,336                    | 3.23%                        | 0                         | 0.00%                       | 152,938                               | 2.06%                                   | 6,250,418                  | 88.07%                       | 5,840,719                    | 78.56%                         | 789,645        | 10.62%           |
| Library3:D1    | 9,019,307       | 1,078,676                 | 11.96%                      | 7,940,631             | 88.04%                  | 3,088                             | 0.04%                               | 203,448                    | 2.56%                        | 0                         | 0.00%                       | 156,179                               | 1.97%                                   | 6,848,135                  | 86.24%                       | 6,341,967                    | 79.87%                         | 729,781        | 9.19%            |
| Library30:D6   | 6,723,875       | 522,151                   | 7.77%                       | 6,201,724             | 92.23%                  | 1,036                             | 0.02%                               | 133,772                    | 2.16%                        | 0                         | 0.00%                       | 116,186                               | 1.87%                                   | 5,474,543                  | 88.28%                       | 5,117,807                    | 82.52%                         | 476,187        | 7.68%            |
| Library31:D11  | 9,937,703       | 874,561                   | 8.80%                       | 9,063,142             | 91.20%                  | 2,761                             | 0.03%                               | 219,465                    | 2.42%                        | 0                         | 0.00%                       | 172,635                               | 1.91%                                   | 7,832,267                  | 86.42%                       | 7,201,698                    | 79.46%                         | 836,014        | 9.22%            |
| Library32:D16  | 7,019,965       | 585,465                   | 8.34%                       | 6,434,500             | 91.66%                  | 1,742                             | 0.03%                               | 143,769                    | 2.23%                        | 0                         | 0.00%                       | 126,981                               | 1.97%                                   | 5,575,392                  | 86.65%                       | 5,201,324                    | 80.84%                         | 586,616        | 9.12%            |
| Library33:D24  | 6,396,929       | 537,848                   | 8.41%                       | 5,859,081             | 91.59%                  | 1,583                             | 0.03%                               | 111,047                    | 1.90%                        | 0                         | 0.00%                       | 126,545                               | 2.16%                                   | 5,112,563                  | 87.26%                       | 4,780,498                    | 81.59%                         | 507,343        | 8.66%            |
| Library34:D29  | 9,976,390       | 876,319                   | 8.78%                       | 9,100,071             | 91.22%                  | 2,437                             | 0.03%                               | 168,142                    | 1.85%                        | 0                         | 0.00%                       | 165,275                               | 1.82%                                   | 7,801,823                  | 85.73%                       | 7,069,705                    | 77.69%                         | 962,394        | 10.58%           |
| Library35:D34  | 8,281,854       | 740,056                   | 8.94%                       | 7,541,798             | 91.06%                  | 866                               | 0.01%                               | 122,491                    | 1.62%                        | 0                         | 0.00%                       | 138,735                               | 1.84%                                   | 6,643,774                  | 88.09%                       | 6,244,307                    | 82.80%                         | 635,932        | 8.43%            |
| Library36:D39  | 6,576,515       | 540,563                   | 8.22%                       | 6,035,952             | 91.78%                  | 480                               | 0.01%                               | 106,357                    | 1.76%                        | 0                         | 0.00%                       | 101,947                               | 1.69%                                   | 5,108,519                  | 84.64%                       | 4,754,205                    | 78.77%                         | 718,649        | 11.91%           |
| Library37:C10  | 7,167,350       | 700,400                   | 9.77%                       | 6,466,950             | 90.23%                  | 1,206                             | 0.02%                               | 93,206                     | 1.44%                        | 0                         | 0.00%                       | 129,417                               | 2.00%                                   | 5,627,325                  | 87.02%                       | 5,261,173                    | 81.36%                         | 615,796        | 9.52%            |
| Library38:C17  | 6,790,880       | 693,005                   | 10.21%                      | 6,097,875             | 89.80%                  | 774                               | 0.01%                               | 105,312                    | 1.73%                        | 0                         | 0.00%                       | 135,804                               | 2.23%                                   | 5,259,845                  | 86.26%                       | 4,879,794                    | 80.03%                         | 596,140        | 9.78%            |
| Library39:D7   | 5,907,088       | 528,606                   | 8.95%                       | 5,378,482             | 91.05%                  | 938                               | 0.02%                               | 128,257                    | 2.39%                        | 0                         | 0.00%                       | 105,073                               | 1.95%                                   | 4,708,461                  | 87.54%                       | 4,414,370                    | 82.08%                         | 435,753        | 8.10%            |
| Library4:D8    | 9,349,419       | 918,497                   | 9.82%                       | 8,430,922             | 90.18%                  | 1,419                             | 0.02%                               | 181,466                    | 2.15%                        | 0                         | 0.00%                       | 181,427                               | 2.15%                                   | 7,102,774                  | 84.25%                       | 6,545,759                    | 77.64%                         | 963,836        | 11.43%           |
| Library40:D12  | 7,427,033       | 709,619                   | 9.56%                       | 6,717,414             | 90.45%                  | 1,116                             | 0.02%                               | 182,694                    | 2.72%                        | 0                         | 0.00%                       | 148,010                               | 2.20%                                   | 5,544,385                  | 82.54%                       | 4,867,949                    | 72.47%                         | 841,209        | 12.52%           |
| Library41:D17  | 7,025,000       | 664,134                   | 9.45%                       | 6,360,866             | 90.55%                  | 2,186                             | 0.03%                               | 151,161                    | 2.38%                        | 0                         | 0.00%                       | 127,522                               | 2.01%                                   | 5,543,654                  | 87.15%                       | 5,123,412                    | 80.55%                         | 536,343        | 8.43%            |
| Library42:D25  | 6,016,934       | 587,547                   | 9.77%                       | 5,429,387             | 90.24%                  | 821                               | 0.02%                               | 65,618                     | 1.21%                        | 0                         | 0.00%                       | 104,291                               | 1.92%                                   | 4,754,929                  | 87.58%                       | 4,391,074                    | 80.88%                         | 503,728        | 9.28%            |
| Library43:D30  | 7,686,440       | 784,278                   | 10.20%                      | 6,902,162             | 89.80%                  | 2,655                             | 0.04%                               | 148,347                    | 2.15%                        | 0                         | 0.00%                       | 129,208                               | 1.87%                                   | 6,040,547                  | 87.52%                       | 5,690,222                    | 82.44%                         | 581,405        | 8.42%            |
| Library44:D35  | 6,752,129       | 665,060                   | 9.85%                       | 6,087,069             | 90.15%                  | 382                               | 0.01%                               | 144,503                    | 2.37%                        | 0                         | 0.00%                       | 117,155                               | 1.93%                                   | 5,109,156                  | 83.94%                       | 4,733,145                    | 77.76%                         | 715,873        | 11.76%           |
| Library45:D40  | 6,941,139       | 637,383                   | 9.18%                       | 6,303,756             | 90.82%                  | 1,282                             | 0.02%                               | 130,784                    | 2.08%                        | 0                         | 0.00%                       | 126,114                               | 2.00%                                   | 5,431,459                  | 86.16%                       | 5,050,831                    | 80.12%                         | 614,117        | 9.74%            |
| Library5:D13   | 5,909,580       | 572,477                   | 9.69%                       | 5,337,103             | 90.31%                  | 764                               | 0.01%                               | 140,107                    | 2.63%                        | 0                         | 0.00%                       | 108,743                               | 2.04%                                   | 4,603,237                  | 86.25%                       | 4,289,690                    | 80.38%                         | 484,252        | 9.07%            |
| Library6:D18   | 6,917,816       | 661,316                   | 9.56%                       | 6,256,500             | 90.44%                  | 1,154                             | 0.02%                               | 143,237                    | 2.29%                        | 0                         | 0.00%                       | 119,385                               | 1.91%                                   | 5,463,810                  | 87.33%                       | 5,044,032                    | 80.62%                         | 528,914        | 8.45%            |
| Library7:D26   | 9,817,020       | 974,649                   | 9.93%                       | 8,842,371             | 90.07%                  | 617                               | 0.01%                               | 166,541                    | 1.88%                        | 0                         | 0.00%                       | 158,889                               | 1.80%                                   | 7,722,357                  | 87.33%                       | 6,875,176                    | 77.75%                         | 793,967        | 8.98%            |
| Library8:D31   | 7,556,654       | 738,610                   | 9.77%                       | 6,818,044             | 90.23%                  | 3,980                             | 0.06%                               | 123,548                    | 1.81%                        | 0                         | 0.00%                       | 133,249                               | 1.95%                                   | 5,954,730                  | 87.34%                       | 5,534,141                    | 81.17%                         | 602,537        | 8.84%            |
| Library9:D36   | 6,380,434       | 571,987                   | 8.97%                       | 5,808,447             | 91.04%                  | 989                               | 0.02%                               | 140,416                    | 2.42%                        | 0                         | 0.00%                       | 110,561                               | 1.90%                                   | 4,987,300                  | 85.86%                       | 4,626,438                    | 79.65%                         | 569,181        | 9.80%            |

**Table S4.** Quality control data for single-embryo RNA-seq.

| Sample | Yield (IVbases) | %PF   | Uniquely mapped #Reads | % of raw clusters per lane | % of $\geq$ Q30 Bases (PF) | Mean Quality Score (PF) |
|--------|-----------------|-------|------------------------|----------------------------|----------------------------|-------------------------|
| CTL1   | 3461            | 87.72 | 16015620               | 7.76                       | 84.6                       | 33.47                   |
| CTL2   | 3253            | 91.87 | 19392099               | 6.96                       | 84.61                      | 33.45                   |
| CTL3   | 2442            | 84.44 | 20545177               | 5.69                       | 84.64                      | 33.54                   |
| DKO1   | 3680            | 92.04 | 14947743               | 7.86                       | 84.65                      | 33.49                   |
| DKO2   | 4162            | 91.37 | 14087557               | 8.96                       | 83.29                      | 33.06                   |
| DKO3   | 3675            | 91.49 | 10897802               | 7.9                        | 83.3                       | 33.07                   |
| DKO4   | 4477            | 91.46 | 16224767               | 9.63                       | 83.42                      | 33.1                    |
| DKO5   | 4819            | 92.55 | 17949154               | 10.24                      | 84.75                      | 33.48                   |

**Table S5.** Quality control data for single embryo RRBS.

|       | Total reads | Mapped reads | % mapping | 1x covered CpGs | 10x covered GpGs | Conversion Rate |
|-------|-------------|--------------|-----------|-----------------|------------------|-----------------|
| CTL a | 19335199    | 8732537      | 45.16     | 1822218         | 833660           | 0.986           |
| CTL b | 17690459    | 7366240      | 41.63     | 1887471         | 924783           | 0.990           |
| CTL c | 15888366    | 6966017      | 43.84     | 2169143         | 750820           | 0.992           |
| DKO a | 16842069    | 8642821      | 51.31     | 1782422         | 930057           | 0.991           |
| DKO b | 13985522    | 4846425      | 34.65     | 1284160         | 289727           | 0.982           |
| DKO c | 23850991    | 11092011     | 46.50     | 1585596         | 780420           | 0.989           |
| DKO d | 17577103    | 7960881      | 45.29     | 725127          | 247318           | 0.982           |
| DKO e | 16332894    | 8839751      | 54.12     | 1497757         | 659754           | 0.987           |



**Dataset S1.** Single-embryo RNA-seq data analyses of control and Tet1/3 DKO embryos and list of genes identified in **Fig. 4B and 4G**.

## Supporting Information References

1. Lewandoski M, Wassarman KM, & Martin GR (1997) Zp3-cre, a transgenic mouse line for the activation or inactivation of loxP-flanked target genes specifically in the female germ line. *Current biology* : *CB* 7(2):148-151.
2. Sadate-Ngatchou PI, Payne CJ, Dearth AT, & Braun RE (2008) Cre recombinase activity specific to postnatal, premeiotic male germ cells in transgenic mice. *Genesis* 46(12):738-742.
3. Yamaguchi S, Shen L, Liu Y, Sendler D, & Zhang Y (2013) Role of Tet1 in erasure of genomic imprinting. *Nature* 504(7480):460-4.
4. Hackett JA, *et al.* (2013) Germline DNA demethylation dynamics and imprint erasure through 5-hydroxymethylcytosine. *Science* 339(6118):448-452.
5. Gu TP, *et al.* (2011) The role of Tet3 DNA dioxygenase in epigenetic reprogramming by oocytes. *Nature* 477(7366):606-610.
6. Anders S & Huber W (2010) Differential expression analysis for sequence count data. *Genome Biol* 11(10):R106.
7. Biase F, Cao X, & Zhong S (2014) Cell fate inclination within 2-cell and 4-cell mouse embryos revealed by single-cell RNA sequencing. *Genome Res* 24(11):1787-96.
8. Yoav Benjamini & Hochberg Y (1995) Controlling the False Discovery Rate: A Practical and Powerful Approach to Multiple Testing. *Journal of the Royal Statistical Society. Series B (Methodological)* 57(1):289-300.
9. Langmead B, Trapnell C, Pop M, & Salzberg SL (2009) Ultrafast and memory-efficient alignment of short DNA sequences to the human genome. *Genome Biol* 10(3):R25.
10. Krueger F & Andrews SR (2011) Bismark: a flexible aligner and methylation caller for Bisulfite-Seq applications. *Bioinformatics* 27(11):1571-1572.
11. Ko M, *et al.* (2011) Impaired hydroxylation of 5-methylcytosine in myeloid cancers with mutant TET2. *Nature* 468(7325):839-843.
12. Huang Y, Pastor WA, Zepeda-Martinez JA, & Rao A (2012) The anti-CMS technique for genome-wide mapping of 5-hydroxymethylcytosine. *Nat Protoc* 7(10):1897-1908.
13. Lorthongpanich C, *et al.* (2013) Single-cell DNA-methylation analysis reveals epigenetic chimerism in preimplantation embryos. *Science* 341(6150):1110-1112.
14. Buttitta L, Mo R, Hui CC, & Fan CM (2003) Interplays of Gli2 and Gli3 and their requirement in mediating Shh-dependent sclerotome induction. *Development* 130(25):6233-6243.
